# Supplementary material for: White-handed gibbons discriminate context-specific song compositions
Source: PeerJ. 2020 Aug 3;8:e9477. doi: 10.7717/peerj.9477 (PMC7409784; doi:10.7717/peerj.9477)
Supplement: Supplemental Information 7 — Sheet 1: Peak intensity of female great call climaxes in spontaneous duet songs Sheet 2: Stimuli characteristics Sheet 3: Response overview of the different tested groups following playback experiments of a duet song or a predator song Sheet 4: Singing responses spreading into non-tested neighbouring groups. Sheet 5: Vocal data set for comparison of song responses to duet playback treatments, spontaneous duet songs and predator songs. Sheet 6: Male reply latency to their female mate great calls in song responses to duet playback treatments, spontaneous duet songs and predator songs Sheet 7: First ten notes produced in song responses to duet playback treatments, spontaneous duet songs and predator songs Sheet 8: Primary male scan sampling data following duet song and predator song playback treatments. Sheet 9: all occurrence behaviours following duet song and predator song playback treatments. Sheet 10: Primary male immediate behaviour following duet song and predator song playback treatments (Latency and duration of first look towards the speaker). [file peerj-08-9477-s007.xlsx]

## Sheet: Great call Decibelmeter
Group	Great call	dB climax
A	1	73.3
A	2	73
A	3	66.4
M	1	65.7
M	2	67.7
M	3	72.9
N	1	84.1
N	2	86.9
N	3	81.5
S	1	80.9
S	2	79.7
S	3	79.9
T	1	78.5
T	2	75
T	3	73.7
W	1	89.9
W	2	94.6
W	3	84.2

## Sheet: Stimuli characteristics
Stimulus_type	Stimulus group	Song duration (s)	Latency to 1st great call (s)	number introductory hoo notes	Duration introductory hoo notes (s)	Number sharp wow	Latency to 1st Sharp wow (s)
Duet song	A	955.943	87.557	14	22.96	0	NA
Duet song	W	1554.21	127.902	4	2.133	0	NA
Duet song	N	1075.27	95.072	7	3.919	18	47.848
Duet song	M	1043.73	107.639	6	2.956	4	179.845
Duet song	S	1112.38	84.398	6	3.743	11	118.393
Duet song	T	1008.04	130.261	4	2.914	0	NA
Predator song	A	2657.53	529.179	78	27.722	108	346.324
Predator song	W	2123.86	2108.03	6	2.656	634	670.204
Predator song	N	2382.34	1172.99	19	6.519	357	426.785
Predator song	M	1589.13	514.272	56	30.555	188	177.235
Predator song	S	3935.13	1147.87	33	16.774	634	316.82
Predator song	T	3108.01	NA	51	28.533	623	186.738
NA= no sharp wow produce

## Sheet: Response overview tested groups
Stimulus group	Tested group	Playback type	Lat_reply	Ov_dur	Lat_1st_Gc	Song_duration	lat_sw
S	W	Duet song	663.12	-437.11	66.788	1164.83	48.801
N	M	Duet song	648.931	-426.339	79.251	1084.31	133.813
M	R	Duet song	776.623	-267.106	100.375	983.777	81.969
T	B	Duet song	711.511	-296.53	79.098	954.348	68.096
A	H	Duet song	590.295	-365.648	169.265	846.87	121.522
W	N	Duet song	NA	NA	NA	NA	NA
A	H	Predator song	3238.47	580.941	819.834	1073.49	193.1
S	W	Predator song	NA	NA	NA	NA	NA
N	M	Predator song	NA	NA	NA	NA	NA
M	R	Predator song	NA	NA	NA	NA	NA
T	B	Predator song	NA	NA	NA	NA	NA
W	N	Predator song	NA	NA	NA	NA	NA
Lat_reply	Latency from stimulus onset to vocal response onset (s)
Ov_dur	Latency from stimulus offset to vocal response onset (s)
Lat_1st_Gc	Latency to first great call (s)
Song_duration	Song duration (s)
lat_sw	Latency to first sharp wowo note (s)
NA	No vocal response

## Sheet: Spread to neighbours
Playback type	Trial number	Tested group	Spread_Group	Song_duration	Lat_1st	SW
Duet song	2	W	None	NA	NA	NA
Duet song	6	M	W	922.543	91.233	0
Duet song	6	M	R	701.714	98.059	0
Duet song	6	M	A	1031.27	79.548	2
Duet song	12	N	None	NA	NA	NA
Duet song	5	B	None	NA	NA	NA
Duet song	3	R	H	578.56	134.321	8
Duet song	9	H	C	854.538	137.192	1
Duet song	9	H	N	719.212	146.871	1
Duet song	9	H	M	834.801	60.747	1
Duet song	9	H	A	506.33	44.305	0
Predator song	7	M	NER	1139.87	354.543	>50
Predator song	1	W	N	1711.93	632.93	>50
Predator song	8	R	None	None	None	None
Predator song	11	B	None	None	None	None
Predator song	10	N	None	None	None	None
Predator song	4	H	None	None	None	None
Spread_group	Other group vocal response apart from tested group
Song_duration	Vocal response duration (s)
Lat_1st	Latency to first great call (s)
SW	Number/presence of Sharp wow notes

## Sheet: Response vs duets vs predator
Song_type	Tested Group	Song duration (s)	Number introductory hoo notes	Duration introductory hoo series (s)	Latency to first great call (s)	Number sharp wow	Latency to 1st sharp wow (s)
Playback response to duet	W	1164.83	7	6.171	66.788	1	48.801
Playback response to duet	M	1084.31	4	1.623	79.251	4	133.813
Playback response to duet	R	983.777	9	4.753	100.375	2	81.969
Playback response to duet	H	846.87	11	8.432	169.265	5	121.522
Playback response to duet	B	954.348	6	2.658	79.098	16	68.096
Spontaneous duet	R	527.515	16	11.026	116.733	7	92.339
Spontaneous duet	H	535.501	8	10.733	136.177	7	32.592
Spontaneous duet	W	768.931	14	7.213	87.189	0	NA
Spontaneous duet	B	1245.1	12	7.387	116.102	10	101.834
Spontaneous duet	M	869.719	5	3.526	50.139	22	85.554
Predator song	M	1589.13	50	23.24	514.272	188	328.44
Predator song	R	3619.18	40	18.08	369.661	537	291.72
Predator song	H	1930.5	69	34.07	1108.77	681	181.08
Predator song	B	2276.1	54	24.16	869.742	254	670.99
Predator song	W	2566.92	31	17.376	1219.57	151	380.081

## Sheet: Male reply to great calls
Song_type	Tested group	Male reply latency to female great call
Response to duet playback	W	0.774
Response to duet playback	W	0.658
Response to duet playback	W	0.679
Response to duet playback	W	0.731
Response to duet playback	W	0.916
Response to duet playback	W	0.847
Response to duet playback	W	0.21
Response to duet playback	W	1.032
Response to duet playback	W	0.658
Response to duet playback	W	1.005
Response to duet playback	W	1.242
Response to duet playback	W	0.336
Response to duet playback	W	0.773
Response to duet playback	W	0.8
Response to duet playback	M	0.444
Response to duet playback	M	0.321
Response to duet playback	M	0.518
Response to duet playback	M	0.08
Response to duet playback	M	1.152
Response to duet playback	M	0.464
Response to duet playback	R	0.086
Response to duet playback	R	0.415
Response to duet playback	R	0.924
Response to duet playback	R	0.783
Response to duet playback	H	-0.789
Response to duet playback	H	-0.925
Response to duet playback	H	-0.722
Response to duet playback	H	-0.904
Response to duet playback	B	0.614
Response to duet playback	B	1.109
Response to duet playback	B	0.247
Response to duet playback	B	1.117
Response to duet playback	B	-0.814
Response to duet playback	B	1.453
Spontaneous duet	R	0.036
Spontaneous duet	R	0.157
Spontaneous duet	R	0.357
Spontaneous duet	H	-0.612
Spontaneous duet	H	-1.001
Spontaneous duet	H	-0.716
Spontaneous duet	W	0.361
Spontaneous duet	W	0.946
Spontaneous duet	W	0.335
Spontaneous duet	W	0.55
Spontaneous duet	W	1.265
Spontaneous duet	W	0.317
Spontaneous duet	B	0.517
Spontaneous duet	B	0.719
Spontaneous duet	B	0.971
Spontaneous duet	B	1.229
Spontaneous duet	B	0.943
Spontaneous duet	B	0.754
Spontaneous duet	B	0.328
Spontaneous duet	B	1.166
Spontaneous duet	B	1.201
Spontaneous duet	B	1.69
Spontaneous duet	M	1.07
Spontaneous duet	M	-1.04
Spontaneous duet	M	1.15
Spontaneous duet	M	0.857
Spontaneous duet	M	1.212
Spontaneous duet	M	1.289
Predator song	B	-2.258
Predator song	B	-1.838
Predator song	B	-0.209
Predator song	B	-2.241
Predator song	B	-0.26
Predator song	H	-4.599
Predator song	H	0.062
Predator song	M	-4.086
Predator song	M	-3.721
Predator song	M	-3.155
Predator song	M	-0.237
Predator song	R	-3.165
Predator song	R	-3.259
Predator song	R	-2.996
Predator song	W	-0.853
Predator song	W	-0.86
Predator song	W	-0.561
Predator song	W	0.092
Predator song	W	-0.042
Predator song	W	-0.106

## Sheet: 1st ten notes
Group	Sex	Song_type	Sequence duration	hoo number	leaning wa number	Waoo number
W	Male	Response to duet playback	10.992	0	0	8
W	Female	Response to duet playback	9.631	1	3	5
M	Male	Response to duet playback	12.598	0	2	5
M	Female	Response to duet playback	13.516	1	1	5
R	Male	Response to duet playback	10.603	2	3	3
R	Female	Response to duet playback	14.264	1	0	5
H	Male	Response to duet playback	13.134	0	0	8
H	Female	Response to duet playback	9.771	1	0	6
B	Male	Response to duet playback	12.039	1	0	5
B	Female	Response to duet playback	11.462	5	1	0
W	Male	Spontanenous duet	12.595	0	0	0
W	Female	Spontanenous duet	9.42	1	4	0
M	Male	Spontanenous duet	13.684	0	1	6
M	Female	Spontanenous duet	17.693	0	0	2
R	Male	Spontanenous duet	10.354	0	4	0
R	Female	Spontanenous duet	11.401	1	0	3
H	Male	Spontanenous duet	10.7	2	0	1
H	Female	Spontanenous duet	8.592	4	0	0
B	Male	Spontanenous duet	9.33	2	1	3
B	Female	Spontanenous duet	12.702	2	0	3
M	Male	Clouded leopard	10.928	1	2	0
M	Female	Clouded leopard	3.709	9	0	0
R	Male	Clouded leopard	8.657	5	0	0
R	Female	Clouded leopard	7.963	7	0	0
H	Male	Clouded leopard	6.399	7	0	0
H	Female	Clouded leopard	9.828	4	0	1
B	Male	Clouded leopard	7.801	8	0	0
B	Female	Clouded leopard	8.209	6	0	0
W	Male	Clouded leopard	5.121	9	0	0
W	Female	Clouded leopard	11.778	5	0	0

## Sheet: Scans
Scan	Playback	Stimulus group	Tested group	Sex	Activity	Emitter	Receiver	Position	Gaze	Elevation (m)	Proximity (m)
0	Duet song	S	W	Male	Vigilance	NA	NA	Sitting/Lying	Speaker	15	5
5	Duet song	S	W	Male	Vigilance	NA	NA	Hanging	Speaker	20	20
10	Duet song	S	W	Male	In motion	NA	NA	Hanging	Speaker	25	40
15	Duet song	S	W	Male	Vocalise	NA	NA	Hanging	Speaker	25	5
20	Duet song	S	W	Male	Vocalise	NA	NA	Hanging	Canopy	25	2
25	Duet song	S	W	Male	Vocalise	NA	NA	Hanging	Canopy	25	2
30	Duet song	S	W	Male	Vocalise	NA	NA	Hanging	Canopy	25	5
35	Duet song	S	W	Male	In motion	NA	NA	Hanging	Canopy	25	2
40	Duet song	S	W	Male	In motion	NA	NA	Hanging	Canopy	25	10
45	Duet song	S	W	Male	Resting	NA	NA	Sitting/Lying	Canopy	25	5
50	Duet song	S	W	Male	Feeding	NA	NA	Sitting/Lying	Canopy	25	10
55	Duet song	S	W	Male	Feeding	NA	NA	Sitting/Lying	Canopy	20	5
60	Duet song	S	W	Male	Vigilance	NA	NA	Hanging	Group member	20	10
0	Predator song	S	W	Male	In motion	NA	NA	Hanging	Speaker	15	30
5	Predator song	S	W	Male	Vigilance	NA	NA	Sitting/Lying	Speaker	25	10
10	Predator song	S	W	Male	Vigilance	NA	NA	Hanging	Ground	30	10
15	Predator song	S	W	Male	Vigilance	NA	NA	Sitting/Lying	Speaker	30	20
20	Predator song	S	W	Male	Vigilance	NA	NA	Sitting/Lying	Speaker	35	20
25	Predator song	S	W	Male	Vigilance	NA	NA	Hanging	Ground	35	20
30	Predator song	S	W	Male	Vigilance	NA	NA	Hanging	Ground	35	20
35	Predator song	S	W	Male	Vigilance	NA	NA	Sitting/Lying	Speaker	35	20
40	Predator song	S	W	Male	Vigilance	NA	NA	Sitting/Lying	Ground	35	20
45	Predator song	S	W	Male	Vigilance	NA	NA	Hanging	Ground	35	25
50	Predator song	S	W	Male	Vigilance	NA	NA	Hanging	Ground	35	25
55	Predator song	S	W	Male	Grooming	Primary male	Female	Sitting/Lying	Group member	25	0
60	Predator song	S	W	Male	Grooming	Primary male	Female	Sitting/Lying	Group member	25	0
0	Duet song	N	M	Male	Vigilance	NA	NA	Hanging	Speaker	10	5
5	Duet song	N	M	Male	Vigilance	NA	NA	Sitting/Lying	Speaker	5	5
10	Duet song	N	M	Male	In motion	NA	NA	Hanging	Canopy	5	10
15	Duet song	N	M	Male	Vocalise	NA	NA	Hanging	Canopy	20	5
20	Duet song	N	M	Male	Vocalise	NA	NA	Hanging	Speaker	15	5
25	Duet song	N	M	Male	Vocalise	NA	NA	Hanging	Canopy	15	5
30	Duet song	N	M	Male	Vigilance	NA	NA	Hanging	Canopy	5	10
35	Duet song	N	M	Male	Feeding	NA	NA	Hanging	Canopy	10	10
40	Duet song	N	M	Male	Resting	NA	NA	Sitting/Lying	Canopy	10	15
45	Duet song	N	M	Male	Resting	NA	NA	Sitting/Lying	Canopy	10	15
50	Duet song	N	M	Male	Feeding	NA	NA	Hanging	Canopy	10	20
55	Duet song	N	M	Male	In motion	NA	NA	Hanging	Canopy	15	20
60	Duet song	N	M	Male	Feeding	NA	NA	Hanging	Canopy	5	10
0	Predator song	N	M	Male	Vigilance	NA	NA	Sitting/Lying	Speaker	25	5
5	Predator song	N	M	Male	Vigilance	NA	NA	Sitting/Lying	Speaker	25	5
10	Predator song	N	M	Male	In motion	NA	NA	Hanging	Canopy	25	5
15	Predator song	N	M	Male	Vigilance	NA	NA	Sitting/Lying	Speaker	30	10
20	Predator song	N	M	Male	Vigilance	NA	NA	Sitting/Lying	Speaker	35	10
25	Predator song	N	M	Male	Vigilance	NA	NA	Hanging	Ground	30	5
30	Predator song	N	M	Male	Vigilance	NA	NA	Sitting/Lying	Speaker	30	10
35	Predator song	N	M	Male	Vigilance	NA	NA	Hanging	Ground	30	5
40	Predator song	N	M	Male	Vigilance	NA	NA	Hanging	Speaker	30	5
45	Predator song	N	M	Male	In motion	NA	NA	Hanging	Ground	30	10
50	Predator song	N	M	Male	In motion	NA	NA	Hanging	Ground	15	30
55	Predator song	N	M	Male	Vigilance	NA	NA	Sitting/Lying	Ground	20	35
60	Predator song	N	M	Male	Vigilance	NA	NA	Hanging	Ground	30	0
0	Duet song	M	R	Male	Feeding	NA	NA	Hanging	Speaker	10	15
5	Duet song	M	R	Male	Feeding	NA	NA	Sitting/Lying	Canopy	10	5
10	Duet song	M	R	Male	Feeding	NA	NA	Sitting/Lying	Canopy	10	10
15	Duet song	M	R	Male	Vocalise	NA	NA	Hanging	Canopy	10	3
20	Duet song	M	R	Male	Vocalise	NA	NA	Sitting/Lying	Canopy	10	1
25	Duet song	M	R	Male	Vocalise	NA	NA	Sitting/Lying	Canopy	10	1
30	Duet song	M	R	Male	Vocalise	NA	NA	Hanging	Canopy	10	5
35	Duet song	M	R	Male	Feeding	NA	NA	Sitting/Lying	Canopy	15	2
40	Duet song	M	R	Male	Grooming	Primary male	Female	Sitting/Lying	Group member	15	0
45	Duet song	M	R	Male	Grooming	Primary male	Female	Sitting/Lying	Group member	15	0
50	Duet song	M	R	Male	Resting	NA	NA	Sitting/Lying	Canopy	15	0
55	Duet song	M	R	Male	Grooming	Primary male	Female	Sitting/Lying	Group member	15	0
60	Duet song	M	R	Male	Grooming	Female	Primary male	Sitting/Lying	Group member	15	0
0	Predator song	M	R	Male	Vigilance	NA	NA	Sitting/Lying	Canopy	30	0
5	Predator song	M	R	Male	Vigilance	NA	NA	Hanging	Speaker	35	2
10	Predator song	M	R	Male	Vigilance	NA	NA	Sitting/Lying	Speaker	35	1
15	Predator song	M	R	Male	Vigilance	NA	NA	Sitting/Lying	Speaker	35	2
20	Predator song	M	R	Male	In motion	NA	NA	Hanging	Canopy	35	15
25	Predator song	M	R	Male	In motion	NA	NA	Hanging	Ground	35	5
30	Predator song	M	R	Male	In motion	NA	NA	Hanging	Ground	25	5
35	Predator song	M	R	Male	Feeding	NA	NA	Sitting/Lying	Canopy	20	10
40	Predator song	M	R	Male	Vigilance	NA	NA	Sitting/Lying	Canopy	15	5
45	Predator song	M	R	Male	Vigilance	NA	NA	Hanging	Ground	15	15
50	Predator song	M	R	Male	In motion	NA	NA	Hanging	Canopy	25	20
55	Predator song	M	R	Male	Feeding	NA	NA	Sitting/Lying	Canopy	25	15
60	Predator song	M	R	Male	Vigilance	NA	NA	Sitting/Lying	Ground	15	15
0	Duet song	A	H	Male	Vigilance	NA	NA	Sitting/Lying	Speaker	10	15
5	Duet song	A	H	Male	Vigilance	NA	NA	Sitting/Lying	Speaker	15	15
10	Duet song	A	H	Male	Vocalise	NA	NA	Hanging	Speaker	15	15
15	Duet song	A	H	Male	Vocalise	NA	NA	Hanging	Speaker	20	5
20	Duet song	A	H	Male	Vocalise	NA	NA	Hanging	Canopy	20	5
25	Duet song	A	H	Male	Vocalise	NA	NA	Sitting/Lying	Canopy	25	5
30	Duet song	A	H	Male	In motion	NA	NA	Hanging	Canopy	25	15
35	Duet song	A	H	Male	Vigilance	NA	NA	Sitting/Lying	Canopy	25	10
40	Duet song	A	H	Male	Feeding	NA	NA	Hanging	Canopy	20	10
45	Duet song	A	H	Male	Feeding	NA	NA	Hanging	Canopy	25	10
50	Duet song	A	H	Male	Feeding	NA	NA	Hanging	Canopy	25	10
55	Duet song	A	H	Male	Feeding	NA	NA	Sitting/Lying	Canopy	20	15
60	Duet song	A	H	Male	Feeding	NA	NA	Hanging	Canopy	20	10
0	Predator song	A	H	Male	Vigilance	NA	NA	Sitting/Lying	Speaker	20	5
5	Predator song	A	H	Male	Vigilance	NA	NA	Hanging	Speaker	25	10
10	Predator song	A	H	Male	Vigilance	NA	NA	Sitting/Lying	Speaker	30	15
15	Predator song	A	H	Male	Vigilance	NA	NA	Sitting/Lying	Speaker	30	15
20	Predator song	A	H	Male	Grooming	Primary male	Offspring	Sitting/Lying	Ground	30	15
25	Predator song	A	H	Male	Grooming	Offspring	Primary male	Sitting/Lying	Ground	30	15
30	Predator song	A	H	Male	Grooming	Offspring	Primary male	Sitting/Lying	Speaker	30	15
35	Predator song	A	H	Male	Vigilance	NA	NA	Sitting/Lying	Ground	30	15
40	Predator song	A	H	Male	Vigilance	NA	NA	Sitting/Lying	Ground	30	15
45	Predator song	A	H	Male	Vigilance	NA	NA	Sitting/Lying	Ground	30	15
50	Predator song	A	H	Male	Grooming	Primary male	Primary male	Sitting/Lying	Canopy	30	10
55	Predator song	A	H	Male	Vocalise	NA	NA	Hanging	Canopy	15	10
60	Predator song	A	H	Male	Vocalise	NA	NA	Hanging	Canopy	15	10
0	Duet song	W	N	Male	Vigilance	NA	NA	Sitting/Lying	Speaker	15	15
5	Duet song	W	N	Male	Vigilance	NA	NA	Sitting/Lying	Speaker	20	10
10	Duet song	W	N	Male	Feeding	NA	NA	Hanging	Speaker	20	10
15	Duet song	W	N	Male	Feeding	NA	NA	Sitting/Lying	Canopy	20	15
20	Duet song	W	N	Male	Vigilance	NA	NA	Sitting/Lying	Speaker	15	15
25	Duet song	W	N	Male	Feeding	NA	NA	Hanging	Speaker	20	20
30	Duet song	W	N	Male	In motion	NA	NA	Hanging	Canopy	15	10
35	Duet song	W	N	Male	Feeding	NA	NA	Sitting/Lying	Canopy	25	10
40	Duet song	W	N	Male	Grooming	Primary male	Offspring	Sitting/Lying	Group member	20	15
45	Duet song	W	N	Male	Feeding	NA	NA	Hanging	Canopy	25	10
50	Duet song	W	N	Male	In motion	NA	NA	Hanging	Canopy	20	5
55	Duet song	W	N	Male	Feeding	NA	NA	Sitting/Lying	Canopy	15	20
60	Duet song	W	N	Male	In motion	NA	NA	Hanging	Canopy	20	5
0	Predator song	W	N	Male	Grooming	Primary male	Offspring	Sitting/Lying	Speaker	10	10
5	Predator song	W	N	Male	Vigilance	NA	NA	Hanging	Speaker	25	5
10	Predator song	W	N	Male	Vigilance	NA	NA	Hanging	Speaker	25	10
15	Predator song	W	N	Male	Vigilance	NA	NA	Sitting/Lying	Ground	25	10
20	Predator song	W	N	Male	Vigilance	NA	NA	Sitting/Lying	Ground	25	5
25	Predator song	W	N	Male	Vigilance	NA	NA	Sitting/Lying	Ground	25	5
30	Predator song	W	N	Male	Vigilance	NA	NA	Sitting/Lying	Speaker	25	2
35	Predator song	W	N	Male	Vigilance	NA	NA	Sitting/Lying	Ground	25	3
40	Predator song	W	N	Male	Grooming	Primary male	Female	Sitting/Lying	Canopy	25	0
45	Predator song	W	N	Male	Grooming	Female	Primary male	Sitting/Lying	Ground	25	0
50	Predator song	W	N	Male	Grooming	Female	Primary male	Sitting/Lying	Ground	25	0
55	Predator song	W	N	Male	In motion	NA	NA	Hanging	Canopy	25	5
60	Predator song	W	N	Male	Vigilance	NA	NA	Sitting/Lying	Canopy	15	10
0	Duet song	T	B	Male	Vigilance	NA	NA	Sitting/Lying	Speaker	25	0
5	Duet song	T	B	Male	Grooming	Primary male	Primary male	Sitting/Lying	Group member	25	1
10	Duet song	T	B	Male	In motion	NA	NA	Hanging	Canopy	25	5
15	Duet song	T	B	Male	Vocalise	NA	NA	Hanging	Canopy	25	5
20	Duet song	T	B	Male	Vocalise	NA	NA	Hanging	Canopy	25	3
25	Duet song	T	B	Male	Vocalise	NA	NA	Sitting/Lying	Group member	25	5
30	Duet song	T	B	Male	Feeding	NA	NA	Sitting/Lying	Canopy	25	5
35	Duet song	T	B	Male	In motion	NA	NA	Hanging	Canopy	20	5
40	Duet song	T	B	Male	Resting	NA	NA	Sitting/Lying	Canopy	15	5
45	Duet song	T	B	Male	Feeding	NA	NA	Hanging	Canopy	15	3
50	Duet song	T	B	Male	Feeding	NA	NA	Hanging	Canopy	10	5
55	Duet song	T	B	Male	In motion	NA	NA	Hanging	Canopy	15	25
60	Duet song	T	B	Male	Feeding	NA	NA	Sitting/Lying	Canopy	10	30
0	Predator song	T	B	Male	Vigilance	NA	NA	Sitting/Lying	Speaker	15	10
5	Predator song	T	B	Male	Vigilance	NA	NA	Hanging	Speaker	15	5
10	Predator song	T	B	Male	Vigilance	NA	NA	Hanging	Ground	15	5
15	Predator song	T	B	Male	Vigilance	NA	NA	Sitting/Lying	Ground	15	2
20	Predator song	T	B	Male	Vigilance	NA	NA	Sitting/Lying	Speaker	15	5
25	Predator song	T	B	Male	In motion	NA	NA	Hanging	Speaker	20	5
30	Predator song	T	B	Male	Vigilance	NA	NA	Hanging	Ground	20	5
35	Predator song	T	B	Male	Vigilance	NA	NA	Hanging	Canopy	10	10
40	Predator song	T	B	Male	Vigilance	NA	NA	Sitting/Lying	Canopy	15	15
45	Predator song	T	B	Male	Vigilance	NA	NA	Sitting/Lying	Canopy	20	15
50	Predator song	T	B	Male	Vigilance	NA	NA	Sitting/Lying	Canopy	20	15
55	Predator song	T	B	Male	Vigilance	NA	NA	Sitting/Lying	Canopy	20	10
60	Predator song	T	B	Male	Vigilance	NA	NA	Sitting/Lying	Canopy	20	10

## Sheet: Ad libitum
Tested group	Sex	Playback treatment	Defecation/Urination	Drop_branch
W	Male	Duet song	0	0
W	Male	Predator song	2	0
B	Male	Duet song	0	0
B	Male	Predator song	5	1
R	Male	Duet song	0	0
R	Male	Predator song	2	2
M	Male	Duet song	1	0
M	Male	Predator song	3	0
H	Male	Duet song	1	0
H	Male	Predator song	3	0
N	Male	Duet song	0	0
N	Male	Predator song	4	0

## Sheet: Immediate
Playback treatment	Stimulus group	Tested group	Individual	Beginning non 'hoo' series at (s)	first look towards speaker at (s)	End first look at (s)	Latency_1st_look (s)	Duration_1st_look (s)	Additional comments
Duet	S	W	Male	7.1	10.6	11.7	3.5	1.1
Duet	M	R	Male	10.9	12	14	1.1	2
Duet	T	B	Male	2.9	5.1	9.2	2.2	4.1	Moving video, but in slow motion, head already down at 9,23 seconds
Duet	N	M	Male	5.5	6.2	8.9	0.7	2.7
Duet	W	N	Male	2.1	3	3.7	0.9	0.7
Predator	S	W	Male	25.5	27.8	48.3	2.3	20.5	Individual at the bottom of the video, during first look, moved 1 m on the right while still looking at the speaker.
Predator	M	R	Male	6.3	16.4	26.7	10.1	10.3
Predator	T	B	Male	1.1	3.9	21.7	2.8	17.8
Predator	N	M	Male	10.1	16.3	21.4	6.2	5.1
Predator	W	N	Male	4.1	6.9	19.5	2.8	12.6
