# Supplementary material for: White-handed gibbons discriminate context-specific song compositions
Source: PeerJ. 2020 Aug 3;8:e9477. doi: 10.7717/peerj.9477 (PMC7409784; doi:10.7717/peerj.9477)
Supplement: Supplemental Information 8 — Groups can either overlap another group’s ongoing duet (counter-singing) or await the end of their song that starts their own duet song. We found that group composition (single vs multi-male groups), relatedness and spatial proximity all played significant roles in whether a group will engage in respectful or counter-singing exchange with a previous duetting group. [file peerj-08-9477-s008.xlsx]

## Sheet: Duet waves
date	wave	Order	group	song_type	Ooaa	Windex	h_start	min_start	sec_start	h_stop	min_stop	sec_stop	GC number	Dist-to-previous (estimated distance
20121218	1	1	unk	Duet	No	GOOD	7	33	16	7	53	27	NA	NA
20121218	1	2	ER	Duet	No	GOOD	7	43	31	8	1	57	3	200
20121218	1	3	NOS	Duet	No	GOOD	7	53	56	8	3	26	7	700
20121218	2	1	M	Duet	No	GOOD	8	18	4	8	36	24	5	NA
20121218	2	2	N	Duet	No	GOOD	8	22	4	8	39	22	7	200
20121218	2	3	W	Duet	No	GOOD	8	29	26	8	42	13	6	250
20121218	3	1	WN	Duet	No	GOOD	10	13	7	10	29	3	5	NA
20121218	3	2	NOS	Duet	No	GOOD	10	26	3	10	35	19	4	150
20130108	1	1	S	Duet	No	GOOD	7	58	38	8	15	18	8	NA
20130108	2	1	R	Duet	No	GOOD	NA	NA	NA	NA	NA	NA	2	700
20130108	2	2	W	Duet	No	GOOD	NA	NA	NA	NA	NA	NA	3	700
20130108	2	3	ER	Duet	No	GOOD	NA	NA	NA	NA	NA	NA	1	200
20130109	1	1	ER	Duet	No	GOOD	7	39	54	7	55	20	7	NA
20130109	1	2	NER	Duet	No	GOOD	7	53	46	8	9	18	5	200
20130109	1	3	R	Duet	No	GOOD	8	2	15	8	23	55	9	200
20130109	2	1	B	Duet	No	GOOD	9	40	33	10	9	36	5	NA
20130109	2	2	A	Duet	No	GOOD	9	45	30	10	10	38	2	100
20130110	1	1	ER	Duet	No	GOOD	7	17	3	7	33	15	7	NA
20130110	2	1	H	Duet	No	GOOD	8	13	3	8	828	56	6	NA
20130110	2	2	A	Duet	No	GOOD	8	23	44	8	25	16	1	200
20130110	2	3	B	Duet	No	GOOD	8	30	56	8	44	29	4	500
20130114	1	1	NER	Duet	No	GOOD	8	3	15	8	11	45	2	NA
20130114	2	1	G	Duet	No	GOOD	9	0	27	9	7	58	2	NA
20130114	2	2	H	Duet	No	GOOD	9	5	24	9	20	47	5	200
20130115	1	1	E	Duet	No	BAD	6	55	2	7	9	24	1	NA
20130115	1	2	N	Duet	No	BAD	7	10	58	NA	NA	NA	1	400
20130115	2	1	W	Duet	No	BAD	10	6	11	10	18	42	3	NA
20130116	1	1	W	Duet	No	GOOD	8	27	45	8	46	32	8	NA
20130116	1	2	unk	Duet	No	GOOD	8	55	5	9	13	40	NA	500
20130116	1	3	ES	Duet	No	GOOD	9	22	2	9	30	41	3	700
20130116	2	1	S	Duet	No	GOOD	10	0	37	10	25	35	9	NA
20130116	2	2	NOS	Duet	No	GOOD	10	28	35	10	43	36	2	500
20130116	3	1	NOS	Duet	No	GOOD	11	23	12	11	37	24	3	NA
20130116	3	2	ES	Duet	No	GOOD	11	33	41	11	46	47	6	200
20130120	1	1	T	Duet	No	GOOD	7	21	17	7	43	7	7	NA
20130120	1	2	N	Duet	No	GOOD	7	34	16	7	49	58	5	500
20130120	1	3	BD	Duet	No	GOOD	7	39	53	7	58	9	7	700(N) 300 (T)
20130120	2	1	T	Duet	No	GOOD	9	14	24	9	28	8	2	NA
20130120	2	2	BD	Duet	No	GOOD	9	16	38	9	26	46	4	500
20130120	2	3	unk	Duet	No	GOOD	9	36	4	9	45	15	2	800
20130121	1	1	W	Duet	No	BAD	8	8	3	8	25	34	9	NA
20130121	1	2	ES	Duet	No	BAD	8	32	36	8	42	57	3	200
20130121	2	1	NOS	Duet	No	BAD	8	57	53	9	14	23	8	500
20130121	3	1	ES	Duet	No	BAD	10	4	14	10	16	56	4	NA
20130123	1	1	S	Duet	No	GOOD	7	39	50	7	44	9	7	NA
20130123	1	2	ES	Duet	No	GOOD	7	50	3	7	59	19	5	300
20130123	1	3	NOS	Duet	No	GOOD	8	6	54	8	14	19	5	50
20130123	2	1	ES	Duet	No	GOOD	8	39	45	8	56	45	6	NA
20130123	2	2	S	Duet	No	GOOD	8	40	54	8	58	40	7	100
20130123	2	3	WN	Duet	No	GOOD	8	59	20	9	11	50	7	700
20130123	3	1	W	Duet	No	GOOD	9	26	38	9	36	29	5	NA
20130124	1	1	A	Duet	No	GOOD	7	35	21	7	46	46	5	NA
20130124	1	2	C	Duet	No	GOOD	7	40	1	7	52	38	7	100
20130124	2	1	N	Duet	No	GOOD	8	21	17	8	35	46	5	NA
20130124	3	1	T	Duet	No	GOOD	8	49	11	8	57	11	4	NA
20130124	3	2	S	Duet	No	GOOD	9	0	41	9	10	8	5	800
20130124	3	3	E	Duet	No	GOOD	9	7	5	9	15	24	7	300
20130124	4	1	H	Duet	No	GOOD	9	33	10	9	51	23	8	NA
20130205	1	1	NOS	Duet	No	GOOD	7	20	1	7	34	58	6	NA
20130205	1	2	S	Duet	No	GOOD	7	32	15	NA	NA	NA	1	100
20130205	2	1	WN	Duet	No	GOOD	9	24	42	9	33	56	1	NA
20130205	2	2	W	Duet	No	GOOD	9	31	6	9	50	10	10	700
20130205	3	1	S	Duet	No	GOOD	10	31	25	10	45	33	8	NA
20130205	3	2	NOS	Duet	No	GOOD	10	46	15	11	9	35	10	100
20130212	1	1	E	Duet	No	BAD	7	35	1	7	41	23	2	NA
20130212	2	1	R	Duet	No	BAD	10	30	41	10	39	56	3	NA
20130212	3	1	W	Duet	No	BAD	13	23	1	13	30	42	4	NA
20130213	1	1	W	Duet	No	BAD	6	57	44	7	10	3	5	NA
20130213	1	2	ER	Duet	No	BAD	7	12	12	7	15	23	1	400
20130213	2	1	W	Duet	No	BAD	7	40	28	7	58	5	8	NA
20130213	2	2	ES	Duet	No	BAD	7	59	15	NA	NA	NA	1	700
20130213	3	1	W	Duet	No	BAD	10	3	55	10	27	2	7	NA
20130213	4	1	WN	Duet	No	BAD	11	41	1	11	50	0	2	NA
20130213	4	2	NOS	Duet	No	BAD	11	46	15	11	55	58	6	100
20130228	1	1	NOS	Duet	No	GOOD	7	55	1	8	14	15	8	NA
20130228	1	2	S	Duet	No	GOOD	8	15	13	8	28	25	3	300
20130228	1	3	ES	Duet	No	GOOD	8	32	54	8	44	56	6	300
20130325	1	1	H	Duet	No	GOOD	7	13	56	7	27	31	4	NA
20130325	1	2	unk	Duet	No	GOOD	7	30	41	7	40	58	4	300
20130325	2	1	A	Duet	Yes	GOOD	7	57	57	8	20	35	8	NA
20130325	2	2	C	Duet	Yes	GOOD	8	1	34	8	28	25	2	100
20130325	3	1	N	Duet	No	GOOD	11	53	45	12	10	2	6	NA
20130325	3	2	H	Duet	No	GOOD	12	11	48	12	23	15	4	400
20130325	4	1	C	Duet	No	GOOD	12	33	2	12	40	11	2	NA
20130325	4	2	A	Duet	No	GOOD	12	38	12	12	54	8	7	200
20130327	1	1	S	Duet	No	GOOD	6	42	3	6	51	48	3	NA
20130327	1	2	ES	Duet	No	GOOD	6	43	54	7	0	36	8	50
20130327	2	1	R	Duet	No	GOOD	7	41	10	7	57	2	5	NA
20130327	3	1	ER	Duet	No	GOOD	8	7	49	8	30	12	10	NA
20130327	3	2	R	Duet	No	GOOD	8	32	14	8	46	2	5	400
20130407	1	1	W	Duet	No	BAD	7	11	14	7	21	23	5	NA
20130407	2	1	ES	Duet	No	BAD	8	3	34	8	19	22	7	NA
20130407	2	2	S	Duet	No	BAD	8	28	36	8	36	31	3	600
20130407	3	1	W	Duet	No	BAD	9	9	36	9	18	33	5	NA
20130407	4	1	NOS	Duet	No	BAD	10	30	38	10	54	31	4	NA
20130407	4	2	S	Duet	No	BAD	10	49	58	11	7	18	3	400
20130409	1	1	A	Duet	No	GOOD	6	52	13	7	8	39	6	NA
20130409	1	2	E	Duet	No	GOOD	7	15	9	7	26	49	4	600
20130409	2	1	B	Duet	No	GOOD	8	39	20	9	12	49	15	NA
20130409	2	2	A	Duet	No	GOOD	9	9	19	9	25	35	8	200
20130409	2	3	T	Duet	No	GOOD	9	10	13	9	53	39	11	300
20130410	1	1	W	Duet	No	BAD	7	33	0	7	39	17	2	NA
20130410	1	2	unk	Duet	No	BAD	7	40	38	7	51	52	6	500
20130410	2	1	M	Duet	No	BAD	9	55	36	10	15	7	5	NA
20130410	2	2	N	Duet	No	BAD	10	3	44	10	20	45	5	150
20130410	2	3	ER	Duet	No	BAD	10	15	15	10	33	56	5	100
20130414	1	1	T	Duet	No	GOOD	7	20	35	7	34	13	1	NA
20130414	1	2	E	Duet	No	GOOD	7	26	7	7	35	45	2	100
20130414	1	3	B	Duet	No	GOOD	7	37	37	7	47	53	5	450
20130414	2	1	C	Duet	No	GOOD	NA	NA	NA	NA	NA	NA	3	700
20130414	3	1	E	Duet	No	GOOD	8	40	56	8	45	33	1	NA
20130414	3	2	N	Duet	No	GOOD	8	49	5	8	50	22	1	300
20130414	3	3	A	Duet	No	GOOD	9	0	8	9	23	27	8	500
20130414	4	1	E	Duet	No	BAD	10	53	55	11	6	44	6	NA
20130414	4	2	T	Duet	No	BAD	11	1	29	11	9	6	3	150
20130415	1	1	H	Duet	No	GOOD	6	45	57	6	55	38	5	NA
20130415	1	2	M	Duet	No	GOOD	6	57	9	7	2	38	1	450
20130415	1	3	ER	Duet	No	GOOD	7	2	47	7	4	32	1	150
20130415	2	1	R	Duet	No	GOOD	8	32	8	NA	NA	NA	2	NA
20130415	2	2	ER	Duet	No	GOOD	8	35	22	8	49	0	8	200
20130415	2	3	M	Duet	No	GOOD	8	37	19	8	57	7	8	250
20130415	3	1	R	Duet	No	BAD	9	56	50	10	1	4	2	NA
20130415	4	1	A	Duet	No	BAD	11	3	54	11	20	2	6	NA
20130418	1	1	T	Duet	No	GOOD	6	44	33	7	8	12	6	NA
20130418	1	2	N	Duet	No	GOOD	6	55	40	7	4	16	2	600
20130418	2	1	B	Duet	No	GOOD	7	37	13	7	52	28	10	NA
20130418	2	2	C	Duet	No	GOOD	7	40	17	7	44	44	1	200
20130418	2	3	T	Duet	No	GOOD	7	48	9	8	3	10	6	250(B) 500 (C)
20130418	3	1	BD	Duet	No	GOOD	8	38	58	8	47	26	5	NA
20130418	3	2	B	Duet	No	GOOD	8	49	33	8	55	52	3	200
20130418	3	3	D	Duet	No	GOOD	8	55	36	9	3	55	3	300
20130419	1	1	N	Duet	No	GOOD	7	11	15	7	15	23	2	NA
20130419	1	2	unk	Duet	No	GOOD	7	18	50	7	28	28	NA	600
20130419	1	3	C	Duet	No	GOOD	7	33	30	7	49	11	4	600
20130419	2	1	A	Duet	No	GOOD	9	18	23	9	37	49	9	NA
20130419	2	2	unk	Duet	No	GOOD	9	32	52	9	44	12	NA	600
20130419	3	1	G	Duet	No	GOOD	10	31	46	10	49	15	7	NA
20130419	3	2	unk	Duet	No	GOOD	10	34	9	10	50	40	4	150
20130420	1	1	R	Duet	No	GOOD	6	39	21	6	52	13	2	NA
20130420	1	2	A	Duet	No	GOOD	6	55	11	7	1	1	2	600
20130420	2	1	ER	Duet	No	GOOD	7	13	21	7	25	50	5	NA
20130420	2	2	H	Duet	No	GOOD	7	24	46	7	36	44	3	500
20130420	2	3	A	Duet	No	GOOD	7	25	31	7	38	49	6	250
20130420	3	1	G	Duet	No	GOOD	8	52	41	9	3	27	6	NA
20130420	4	1	ER	Duet	No	GOOD	NA	NA	NA	NA	NA	NA	1	NA
20130420	4	2	M	Duet	No	GOOD	NA	NA	NA	NA	NA	NA	2	NA
20130422	1	1	A	Duet	No	GOOD	6	17	46	6	24	5	2	NA
20130422	1	2	E	Duet	Yes	GOOD	6	23	36	6	35	56	5	400
20130422	1	3	N	Duet	Yes	GOOD	6	27	30	6	45	40	4	350
20130423	1	1	ES	Duet	No	BAD	7	34	8	7	49	40	10	NA
20130423	1	2	NOS	Duet	No	BAD	7	52	55	8	4	3	7	200
20130423	2	1	ES	Duet	No	BAD	9	5	6	NA	NA	NA	2	NA
20130424	1	1	S	Duet	No	GOOD	6	52	53	6	56	55	1	NA
20130424	1	2	W	Duet	No	GOOD	6	57	26	7	7	53	4	600
20130424	2	1	S	Duet	No	GOOD	7	44	34	7	54	27	1	NA
20130424	2	2	N	Duet	No	GOOD	7	56	36	8	14	24	1	600
20130424	2	3	unk	Duet	No	GOOD	8	15	45	NA	NA	NA	1	400
20130509	1	1	N	Duet	Yes	GOOD	7	10	47	7	25	9	4	NA
20130509	2	1	W	Duet	No	GOOD	7	39	2	7	48	6	4	NA
20130509	3	1	S	Duet	No	GOOD	9	10	22	9	28	53	7	NA
20130509	3	2	N	Duet	No	GOOD	9	18	44	9	30	19	5	400
20130509	3	3	ES	Duet	No	GOOD	9	29	7	NA	NA	NA	2	400
20130509	4	1	W	Duet	Yes	GOOD	10	48	51	11	11	42	12	NA
20130512	1	1	B	Duet	No	BAD	7	44	20	8	9	57	7	NA
20130512	1	2	A	Duet	No	BAD	8	5	29	8	14	7	4	500
20130512	2	1	A	Duet	No	BAD	8	30	10	8	42	9	6	NA
20130512	2	2	H	Duet	No	BAD	8	51	50	9	1	31	1	500
20130512	3	1	M	Duet	No	BAD	9	42	14	9	53	1	2	NA
20130512	4	1	ER	Duet	No	BAD	10	6	47	10	16	58	4	NA
20130512	4	2	W	Duet	No	BAD	10	18	15	NA	NA	NA	4	500
20130512	5	1	unk	Duet	No	BAD	11	8	15	11	19	36	2	NA
20130512	5	2	W	Duet	No	BAD	11	22	35	11	33	27	6	700
20130513	1	1	NOS	Duet	Yes	BAD	7	37	36	7	47	59	6	NA
20130513	1	2	N	Duet	No	BAD	NA	NA	NA	NA	NA	NA	5	800
20130513	2	1	NNOS	Duet	No	BAD	8	40	28	8	56	57	1	NA
20130513	2	2	NOS	Duet	No	BAD	8	46	30	8	56	43	4	200
20130513	2	3	ER	Duet	No	BAD	8	58	17	NA	NA	NA	4	900
20130514	1	1	M	Duet	No	GOOD	7	11	22	7	22	34	3	NA
20130514	2	1	A	Duet	No	GOOD	8	31	12	8	36	25	3	NA
20130514	2	2	ER	Duet	No	GOOD	8	35	14	8	49	58	6	500
20130514	3	1	G	Duet	No	GOOD	9	21	35	NA	NA	NA	2	NA
20130514	3	2	H	Duet	Yes	GOOD	9	23	54	9	40	45	6	200
20130514	4	1	R	Duet	No	GOOD	11	36	11	11	52	57	3	NA
20130514	4	2	G	Duet	No	GOOD	11	38	9	1	55	17	7	100
20130515	1	1	R	Duet	No	GOOD	6	15	42	NA	NA	NA	1	NA
20130515	2	1	M	Duet	No	GOOD	7	20	25	7	39	45	5	NA
20130515	2	2	H	Duet	No	GOOD	7	23	15	7	38	19	3	300
20130515	2	3	R	Duet	No	GOOD	7	35	23	7	40	25	2	300
20130515	3	1	G	Duet	No	GOOD	8	15	42	8	34	10	8	NA
20130515	3	2	H	Duet	No	GOOD	8	18	28	8	30	2	3	150
20130515	3	3	NER	Duet	No	GOOD	8	20	16	NA	NA	NA	2	1200
20130515	4	1	NER	Duet	No	BAD	9	38	29	9	50	12	3	NA
20130515	5	1	H	Duet	Yes	BAD	10	25	41	10	33	58	3	NA
20130515	5	2	M	Duet	Yes	BAD	10	28	34	10	48	9	6	200
20130520	1	1	A	Duet	No	GOOD	7	6	30	7	11	44	2	NA
20130520	1	2	B	Duet	No	GOOD	7	8	51	7	26	27	6	100
20130520	2	1	E	Duet	No	GOOD	8	28	53	8	37	47	2	NA
20130520	2	2	C	Duet	No	GOOD	8	39	27	NA	NA	NA	3	600
20130520	2	3	T	Aborted duet	No	GOOD	NA	NA	NA	NA	NA	NA	0	400
20130520	3	1	N	Duet	Yes	GOOD	9	1	21	9	21	52	8	NA
20130520	3	2	E	Duet	No	GOOD	9	5	51	9	11	40	3	100
20130520	4	1	B	Duet	No	GOOD	9	56	15	10	10	3	5	NA
20130520	5	1	A	Duet	No	GOOD	10	49	5	10	54	13	1	NA
20130520	5	2	BD	Duet	No	GOOD	10	54	2	11	6	52	6	200
20130522	1	1	B	Duet	No	GOOD	7	28	27	7	36	38	6	NA
20130522	2	1	A	Duet	No	GOOD	8	58	15	9	9	25	4	NA
20130522	3	1	A	Duet	No	BAD	10	7	18	10	18	20	5	250
20130522	3	2	unk	Duet	No	BAD	10	19	11	NA	NA	NA	NA	500
20130522	4	1	M	Duet	No	BAD	11	22	38	11	30	3	2	NA
20130522	5	1	S	Duet	No	BAD	11	45	34	NA	NA	NA	4	NA
20130523	1	1	ER	Duet	No	BAD	6	27	57	6	32	5	2	NA
20130523	1	2	R	Duet	No	BAD	6	34	41	6	37	27	2	300
20130523	2	1	H	Duet	No	BAD	6	59	44	7	6	55	2	NA
20130523	2	2	M	Duet	No	BAD	7	8	2	7	18	48	3	400
20130523	2	3	NER	Duet	No	BAD	7	21	28	7	39	18	6	700
20130523	3	1	M	Duet	No	BAD	8	40	9	8	52	29	6	NA
20130523	3	2	NER	Duet	No	BAD	8	52	50	9	0	5	1	600
20130523	3	3	G	Duet	No	BAD	9	3	20	9	12	1	1	700
20130526	1	1	N	Duet	Yes	GOOD	6	18	56	6	27	34	3	100
20130526	2	1	E	Duet	Yes	GOOD	6	35	14	6	51	31	5	NA
20130526	2	2	A	Duet	Yes	GOOD	6	40	26	6	54	5	6	250
20130526	3	1	A	Duet	No	BAD	7	39	25	8	3	51	5	NA
20130526	3	2	M	Duet	No	BAD	7	59	59	20	20	53	2	700
20130526	3	3	ER	Duet	No	BAD	8	0	32	8	19	8	3	150
20130527	1	1	H	Duet	No	GOOD	6	40	30	6	57	53	2	NA
20130527	1	2	A	Duet	No	GOOD	6	50	50	7	16	40	5	250
20130527	1	3	N	Duet	No	GOOD	6	58	26	7	5	54	5	1000
20130527	2	1	B	Duet	Yes	GOOD	7	22	49	7	50	1	17	NA
20130527	2	2	BD	Duet	No	GOOD	7	24	16	7	40	17	9	50
20130527	2	3	C	Duet	No	GOOD	7	41	7	7	53	25	5	450
20130527	3	1	B	Duet	No	GOOD	9	49	46	9	57	22	6	NA
20130527	3	2	T	Duet	No	GOOD	9	56	7	10	2	49	1	600
20130527	4	1	H	Duet	No	GOOD	10	49	41	11	2	56	5	NA
20130529	1	1	W	Duet	No	GOOD	6	20	34	6	28	29	1	NA
20130529	1	2	unk	Duet	No	GOOD	6	31	9	6	48	36	3	NA
20130529	1	3	ER	Duet	No	GOOD	6	46	54	7	14	42	5	NA
20130529	2	1	N	Duet	No	GOOD	8	7	18	8	18	37	3	NA
20130529	2	2	NOS	Duet	No	GOOD	8	19	34	8	32	37	5	800
20130529	3	1	ES	Duet	No	GOOD	9	0	47	9	11	0	4	NA
20130529	3	2	S	Duet	No	GOOD	9	2	18	9	20	43	8	100
20130531	1	1	E	Duet	Yes	GOOD	6	10	0	6	31	10	3	NA
20130531	1	2	A	Duet	No	GOOD	6	26	24	6	43	7	9	350
20130531	1	3	T	Duet	No	GOOD	6	32	4	6	58	32	7	500 (A) 350 E
20130531	2	1	N	Duet	Yes	GOOD	7	12	48	7	43	13	11	NA
20130531	2	2	B	Duet	No	GOOD	7	36	9	7	57	58	13	500
20130521	2	3	BD	Duet	No	GOOD	7	41	57	7	56	14	4	100
20130531	3	1	C	Duet	No	GOOD	10	5	13	10	18	9	5	NA
20130531	3	2	H	Duet	Yes	GOOD	10	9	21	10	23	45	5	400
20130603	1	1	W	Duet	No	GOOD	6	51	38	7	5	53	4	NA
20130603	1	2	N	Duet	No	GOOD	7	1	12	7	22	6	5	200
20130603	2	1	W	Duet	Yes	GOOD	7	47	51	7	55	1	2	NA
20130603	2	2	NOS	Duet	Yes	GOOD	7	53	14	8	1	18	3	100
20130603	2	3	S	Duet	Yes	GOOD	7	59	48	8	12	8	5	300
20130603	3	1	NOS	Duet	No	BAD	11	43	49	11	51	43	2	NA
20130603	3	2	unk	Duet	No	BAD	11	52	6	NA	NA	NA	NA	600
20130608	1	1	M	Duet	No	GOOD	6	53	1	7	7	29	6	NA
20130608	1	2	A	Duet	No	GOOD	6	58	3	7	18	23	6	450
20130608	1	3	B	Duet	No	GOOD	7	9	30	7	25	43	11	100
20130608	2	1	A	Duet	No	GOOD	8	3	58	8	15	31	5	NA
20130608	2	2	H	Duet	No	GOOD	8	15	40	8	30	7	5	200
20130608	2	3	N	Duet	No	GOOD	8	33	47	8	54	38	5	500
20130608	3	1	T	Duet	No	GOOD	9	9	12	9	25	2	5	NA
20130608	3	2	BD	Duet	No	GOOD	9	27	58	9	39	43	5	300
20130608	4	1	H	Duet	No	GOOD	11	57	39	12	10	35	3	NA
20130610	1	1	BD	Duet	No	BAD	8	36	12	8	43	54	5	NA
20130610	1	2	B	Duet	No	BAD	8	45	2	8	54	39	2	300
20130610	2	1	T	Duet	No	BAD	9	31	25	9	47	5	5	NA
20130610	3	1	B	Duet	No	BAD	10	1	26	10	16	52	9	NA
20130611	1	1	W	Duet	No	GOOD	NA	NA	NA	NA	NA	NA	4	NA
20130611	1	2	S	Duet	No	GOOD	NA	NA	NA	NA	NA	NA	1	600
20130611	1	3	ES	Duet	No	GOOD	NA	NA	NA	NA	NA	NA	4	300
20130611	2	1	N	Duet	No	GOOD	NA	NA	NA	NA	NA	NA	8	NA
20130613	1	1	N	Duet	No	GOOD	6	24	29	6	44	20	3	NA
20130613	1	2	S	Duet	No	GOOD	6	48	45	7	0	22	3	600
20130613	1	3	ES	Duet	No	GOOD	7	2	47	7	18	45	2	300
20130613	2	1	unk	Duet	No	GOOD	8	25	14	8	38	43	3	NA
20130613	2	2	ER	Duet	No	GOOD	8	34	16	9	0	55	8	NA
20130613	2	3	unk	Duet	No	GOOD	9	8	37	9	21	47	2	NA
20130613	3	1	M	Duet	No	GOOD	9	43	44	10	6	40	4	NA
20130613	3	2	W	Duet	No	GOOD	10	5	50	10	23	53	8	500
20130613	3	3	ER	Duet	No	GOOD	10	25	43	10	36	2	5	300
20130613	4	1	unk	Duet	No	GOOD	11	7	18	11	21	15	4	NA
20130613	4	2	S	Duet	No	GOOD	11	18	45	11	36	27	5	NA
20130613	4	3	NOS	Duet	No	GOOD	11	40	11	NA	NA	NA	2	500
20130617	1	1	W	Duet	No	BAD	6	19	51	6	50	59	15	NA
20130617	1	2	unk	Duet	No	BAD	6	49	11	7	3	29	2	500
20130617	2	1	N	Duet	No	BAD	7	32	57	NA	NA	NA	2	NA
20130617	2	2	S	Duet	No	BAD	7	42	53	8	4	26	2	300
20130627	1	1	T	Duet	No	GOOD	6	45	28	6	50	21	1	NA
20130627	2	1	A	Duet	No	GOOD	7	22	0	7	25	27	2	NA
20130627	2	2	E	Duet	No	GOOD	7	29	48	7	35	12	2	650
20130627	2	1	C	Duet	Yes	GOOD	8	35	7	8	45	32	6	NA
20130627	3	1	T	Duet	No	GOOD	10	42	7	10	54	2	6	NA
20130630	1	1	ES	Duet	No	BAD	6	37	36	6	49	25	6	NA
20130630	1	2	S	Duet	No	BAD	6	47	56	7	8	43	6	150
20130701	1	1	N	Duet	No	GOOD	7	3	9	7	22	57	8	NA
20130701	1	2	W	Duet	No	GOOD	7	9	6	7	22	33	8	400
20130702	1	1	H	Duet	No	BAD	6	59	23	7	10	40	4	NA
20130702	1	2	M	Duet	No	BAD	7	8	25	NA	NA	NA	3	300
20130702	1	3	G	Duet	Yes	BAD	7	12	3	7	38	16	8	400
20130702	1	3	R	Duet	Yes	BAD	7	12	55	7	26	59	7	250
20130702	2	1	G	Duet	No	BAD	8	11	52	8	30	12	4	NA
20130702	2	2	H	Duet	No	BAD	8	13	58	8	24	56	4	100
20130702	2	3	M	Duet	No	BAD	8	30	40	8	46	8	9	500
20130702	3	1	R	Duet	No	BAD	9	31	34	9	50	31	7	NA
20130703	1	1	W	Duet	No	GOOD	6	16	45	6	23	42	3	NA
20130703	1	2	R	Duet	No	GOOD	6	32	5	6	51	46	3	600
20130703	1	3	M	Duet	No	GOOD	6	51	4	7	12	31	6	200
20130703	2	1	N	Duet	No	GOOD	7	45	44	8	6	3	5	NA
20130703	3	1	ES	Duet	No	GOOD	8	30	24	8	52	48	7	NA
20130703	3	2	NOS	Duet	No	GOOD	8	56	25	9	11	58	4	500
20130703	3	3	W	Duet	No	GOOD	9	15	9	9	22	33	2	600
20130710	1	1	A	Duet	No	GOOD	7	8	33	7	20	55	2	NA
20130710	2	1	E	Duet	No	GOOD	8	2	43	8	12	33	NA	NA
20130710	2	2	B	Duet	Yes	GOOD	8	15	47	8	59	33	18	500
20130710	2	3	A	Duet	Yes	GOOD	8	23	49	8	56	37	13	450
20130710	4	1	A	Duet	No	BAD	10	2	52	10	12	35	6	NA
20130710	5	1	A	Duet	No	BAD	10	55	9	11	0	39	3	NA
20130710	6	1	BD	Duet	No	BAD	11	17	59	11	33	57	6	NA
20130710	6	2	T	Duet	No	BAD	11	40	18	11	52	7	2	500
20130711	1	1	W	Duet	No	BAD	NA	NA	NA	NA	NA	NA	1	NA
20130711	2	1	S	Duet	No	BAD	NA	NA	NA	NA	NA	NA	4	NA
20130711	2	2	W	Duet	No	BAD	NA	NA	NA	NA	NA	NA	4	150
20130711	3	1	N	Duet	No	BAD	NA	NA	NA	NA	NA	NA	1	NA
20130711	4	1	M	Duet	No	BAD	10	7	20	10	10	38	1	NA
20130711	4	2	W	Duet	No	BAD	10	12	11	10	26	29	6	400
20130711	5	1	ER	Duet	No	BAD	11	33	43	11	37	0	1	NA
20130712	1	1	S	Duet	No	BAD	6	55	12	7	6	51	5	NA
20130712	1	2	A	Duet	No	BAD	7	13	47	7	29	25	5	800
20130712	2	1	N	Duet	No	BAD	10	15	3	10	26	52	5	NA
20130712	2	2	H	Duet	No	BAD	10	30	2	10	46	18	4	500
20130712	2	3	ER	Duet	No	BAD	10	35	1	10	38	38	1	700
20130712	3	1	A	Duet	No	BAD	11	37	52	11	49	49	3	NA
20130713	1	1	H	Duet	No	GOOD	6	46	35	6	56	16	3	NA
20130713	1	2	ER	Duet	No	GOOD	6	55	15	7	0	32	1	350
20130713	1	3	NER	Duet	No	GOOD	6	57	15	7	9	1	6	250
20130713	2	1	R	Duet	No	GOOD	7	29	44	7	40	24	3	NA
20130713	2	2	ER	Duet	No	GOOD	7	43	21	7	55	27	6	600
20130713	2	3	M	Duet	No	GOOD	7	53	25	8	13	10	4	250
20130713	3	1	C	Duet	No	GOOD	8	49	32	9	7	50	10	NA
20130713	3	2	H	Duet	No	GOOD	9	4	21	9	17	37	3	250
20130715	1	1	L	Duet	No	BAD	7	12	12	7	19	2	3	NA
20130715	1	2	G	Duet	No	BAD	7	19	16	7	28	31	5	400
20130715	1	3	M	Duet	No	BAD	7	31	0	7	44	45	5	600
20130715	2	1	ER	Duet	No	GOOD	11	33	25	11	42	15	4	NA
20130715	2	2	N	Duet	No	GOOD	11	38	45	11	58	19	9	200
20130715	3	1	W	Duet	Yes	GOOD	12	23	48	12	39	45	8	NA
20130716	1	1	E	Duet	No	BAD	7	44	7	8	6	38	8	NA
20130716	1	2	S	Duet	No	BAD	8	3	58	8	29	42	8	350
20130716	1	3	N	Duet	No	BAD	8	12	37	8	39	56	7	400
20130720	1	1	L	Duet	No	GOOD	6	46	14	6	56	27	4	NA
20130720	1	2	H	Duet	No	GOOD	6	58	21	7	13	51	7	300
20130720	1	3	ER	Duet	No	GOOD	7	8	19	7	10	49	1	600
20130720	2	1	N	Duet	No	GOOD	7	27	12	7	57	35	5	NA
20130720	2	2	M	Duet	Yes	GOOD	7	50	37	8	4	21	3	300
20130720	2	3	R	Duet	No	GOOD	7	58	3	8	9	56	4	250
20130720	3	1	E	Duet	No	GOOD	8	34	10	8	47	56	3	NA
20130720	3	2	A	Duet	No	GOOD	8	49	57	9	4	0	5	900
20130720	3	3	ER	Duet	No	GOOD	9	3	27	9	6	33	1	700
20130720	4	1	W	Duet	No	GOOD	9	50	29	10	1	19	3	NA
20130720	4	2	E	Duet	No	GOOD	10	2	15	10	12	18	3	700
20130720	4	3	ER	Duet	No	GOOD	10	13	49	10	17	28	1	400
20130722	1	1	T	Duet	No	BAD	8	5	19	8	9	0	1	NA
20130722	2	1	B	Duet	No	BAD	8	35	1	8	42	12	3	NA
20130722	2	2	A	Duet	no	BAD	8	42	27	8	58	47	4	400
20130722	2	3	T	Duet	No	BAD	8	48	21	8	54	56	2	600
20130722	3	1	S	Duet	No	BAD	9	49	48	10	2	34	3	NA
20130722	3	2	unk	Duet	No	BAD	NA	NA	NA	NA	NA	NA	NA	NA
20130722	3	3	N	Duet	No	BAD	10	9	7	10	23	39	3	NA
20131112	1	1	ER	Duet	No	GOOD	8	29	53	8	40	20	3	NA
20131112	2	1	N	Duet	No	GOOD	8	51	17	9	19	49	3	NA
20131112	2	2	M	Duet	No	GOOD	9	4	38	9	21	43	7	200
20131112	2	3	H	Duet	No	GOOD	9	21	26	9	33	47	7	300
20131114	1	1	NER	Duet	No	GOOD	7	56	11	8	8	34	4	NA
20131114	1	2	R	Duet	No	GOOD	8	0	25	8	4	56	1	200
20131114	2	1	NER	Duet	No	BAD	10	32	6	10	55	48	6	NA
20131114	2	2	ER	Duet	No	BAD	10	33	11	10	49	58	4	200
20131115	1	1	W	Duet	No	BAD	7	13	20	7	34	10	6	NA
20131115	1	2	M	Duet	No	BAD	7	28	30	7	33	31	2	200
20131115	1	3	N	Duet	Yes	BAD	7	38	26	7	43	50	3	500
20131115	2	1	H	Duet	No	BAD	8	9	7	8	29	57	8	NA
20131115	2	2	N	Duet	No	BAD	8	10	1	8	24	56	5	700
20131119	1	1	N	Duet	No	BAD	6	38	10	6	52	14	4	NA
20131119	3	1	A	Duet	No	BAD	7	7	35	7	28	56	5	NA
20131119	4	1	N	Duet	Yes	BAD	7	46	13	8	5	31	7	600
20131119	4	2	B	Duet	No	BAD	8	5	49	8	14	32	3	600
20131119	5	1	E	Duet	No	BAD	9	46	57	10	2	44	7	NA
20131121	1	1	S	Duet	No	BAD	7	21	13	7	37	25	7	NA
20131121	2	1	A	Duet	No	BAD	7	48	41	8	7	10	9	NA
20131121	2	2	N	Duet	No	BAD	7	57	29	8	15	20	3	200
20131122	1	1	R	Duet	No	BAD	9	59	33	10	7	47	3	NA
20131122	1	2	M	Duet	No	BAD	10	11	50	10	28	0	6	400
20131122	2	1	S	Duet	No	BAD	11	19	10	NA	NA	NA	3	NA
20131123	1	1	E	Duet	No	GOOD	7	6	3	7	13	14	1	NA
20131123	2	1	H	Duet	No	GOOD	7	27	31	7	41	9	2	NA
20131123	2	2	NER	Duet	No	GOOD	7	46	47	8	9	12	4	700
20131123	2	3	unk	Duet	No	GOOD	NA	NA	NA	NA	NA	NA	3	300
20131123	3	1	W	Duet	No	GOOD	10	11	35	10	21	11	3	NA
20131123	3	2	NOS	Duet	Yes	GOOD	10	25	9	10	53	8	9	400
20131123	4	1	ER	Duet	No	GOOD	11	56	30	12	8	54	3	NA
20131126	1	1	G	Duet	No	BAD	7	44	35	7	53	56	1	NA
20131126	2	1	G	Duet	No	BAD	8	26	53	8	34	33	4	NA
20131126	2	2	NER	Duet	No	BAD	8	35	35	8	51	29	4	NA
20131127	1	1	E	Duet	No	BAD	7	4	54	7	17	25	3	NA
20131129	1	1	N	Duet	No	BAD	9	2	20	9	15	10	2	NA
20131129	1	2	S	Duet	No	BAD	9	18	31	9	32	38	3	700
20131129	2	1	N	Duet	No	BAD	12	55	13	13	9	4	1	NA
20131130	1	1	A	Duet	No	BAD	8	9	22	8	27	19	10	500
20131130	2	1	B	Duet	No	BAD	9	3	8	9	20	43	5	NA
20131130	2	2	A	Duet	No	BAD	9	13	8	9	31	18	6	250
20131130	2	2	D	Duet	No	BAD	9	18	22	9	35	6	4	600
20131130	2	3	C	Duet	No	BAD	9	35	35	9	51	50	9	500
20131201	1	1	ER	Duet	No	BAD	7	14	6	7	38	3	13	NA
20131201	1	2	unk	Duet	No	BAD	NA	NA	NA	NA	NA	NA	1	NA
20131201	1	3	NER	Duet	No	BAD	7	44	20	7	54	20	4	NA
20131201	2	1	NER	Duet	No	BAD	9	13	27	9	16	15	2	NA
20131201	3	1	M	Duet	No	BAD	10	11	48	10	21	47	4	NA
20131206	1	1	ER	Duet	No	BAD	6	49	36	6	54	37	2	200
20131206	2	1	R	Duet	No	BAD	8	55	17	8	59	23	1	NA
20131206	3	1	R	Duet	No	BAD	10	16	15	10	19	51	1	NA
20131207	1	1	C	Duet	No	BAD	7	18	21	7	37	2	7	NA
20131207	1	2	A	Duet	No	BAD	7	27	42	7	51	38	11	200
20131207	1	3	B	Duet	No	BAD	7	47	13	8	10	23	9	150
20131209	1	1	H	Duet	No	GOOD	8	33	9	8	46	18	2	NA
20131209	2	1	R	Duet	No	GOOD	9	16	13	9	26	31	3	NA
20131209	2	2	ER	Duet	No	GOOD	9	23	1	9	41	14	3	250
20131209	2	3	M	Duet	No	GOOD	9	26	14	9	42	37	4	200
20131209	3	1	R	Duet	No	GOOD	10	22	30	10	32	6	4	NA
20131209	4	1	C	Duet	No	GOOD	NA	NA	NA	NA	NA	NA	5	NA
20131214	1	1	G	Duet	No	GOOD	7	39	45	7	51	55	3	NA
20131214	1	2	L	Duet	No	GOOD	7	46	37	7	58	5	2	200
20131214	1	3	M	Duet	No	GOOD	8	7	22	8	26	51	3	800
20131214	2	1	C	Duet	No	BAD	9	50	4	10	5	12	2	NA
20131214	2	2	A	Duet	No	BAD	9	59	4	10	6	14	2	300
20131214	3	1	C	Duet	No	BAD	10	18	8	10	34	41	6	NA
20131214	4	1	NER	Duet	No	BAD	11	53	56	12	8	20	4	NA
20131215	1	1	unk	Duet	No	GOOD	7	44	42	8	3	28	7	NA
20131215	1	2	C	Duet	No	GOOD	8	2	53	8	9	58	1	NA
20131215	1	3	H	Duet	No	GOOD	8	4	38	8	20	28	2	200
20131215	2	1	B	Duet	Yes	GOOD	9	25	49	9	39	19	5	NA
20131215	2	2	BD	Duet	Yes	GOOD	9	28	31	9	53	56	12	100
20131215	3	1	N	Duet	No	BAD	10	45	30	11	6	39	5	NA
20131215	3	2	T	Duet	No	BAD	11	5	57	11	20	42	5	250
20131215	3	3	A	Duet	No	BAD	11	17	34	11	35	25	10	300
20131216	1	1	A	Duet	No	BAD	9	3	51	9	9	6	3	NA
20131216	2	1	M	Duet	No	BAD	9	22	33	9	34	36	3	NA
20131216	3	1	T	Duet	Yes	BAD	10	26	48	10	39	50	5	NA
20131216	4	1	BD	Duet	Yes	BAD	11	39	16	11	46	30	4	NA
20131216	5	1	B	Duet	No	BAD	11	58	2	12	2	47	2	NA
20131219	1	1	NOS	Duet	No	BAD	8	42	47	NA	NA	NA	1	NA
20131220	1	1	R	Duet	No	BAD	7	29	30	7	56	29	9	NA
20131220	1	2	M	Duet	No	BAD	7	54	6	8	8	30	6	200
20131220	1	3	ER	Duet	Yes	BAD	8	4	44	8	23	46	3	250
20131220	2	1	A	Duet	Yes	BAD	10	33	11	10	52	41	8	NA
20131220	2	2	C	Duet	Yes	BAD	10	38	2	11	1	5	6	200
20131220	2	3	H	Duet	No	BAD	11	4	44	11	15	51	3	500
20131221	1	1	C	Duet	No	BAD	6	54	25	7	16	22	4	NA
20131221	1	3	H	Duet	No	GOOD	7	19	7	7	30	22	4	400
20131221	3	1	B	Duet	No	BAD	9	43	20	9	56	17	6	150
20131223	1	1	M	Duet	No	BAD	8	54	10	9	25	29	6	NA
20131223	1	2	ER	Duet	No	BAD	9	12	44	9	29	11	4	200
20131223	1	3	NER	Duet	No	BAD	9	13	50	9	26	9	3	250
20131223	2	1	R	Duet	No	BAD	10	16	28	10	32	32	5	NA
20131223	3	1	H	Duet	No	BAD	11	49	27	NA	NA	NA	1	NA
20131225	1	1	NER	Duet	No	BAD	8	41	18	8	50	54	5	NA
20131225	1	2	M	Duet	No	BAD	8	52	42	9	8	6	4	800
20131225	1	3	ER	Duet	No	BAD	9	7	48	9	16	1	3	250
20131226	1	1	N	Duet	No	GOOD	7	52	10	8	2	23	5	NA
20131226	1	2	E	Duet	No	GOOD	8	8	33	8	25	13	5	350
20131226	1	3	T	Duet	No	GOOD	8	26	46	8	38	20	5	350
20131226	2	1	B	Duet	Yes	GOOD	9	50	21	10	15	28	14	NA
20131226	2	2	T	Duet	No	GOOD	9	52	26	9	54	43	1	150
20140110	1	1	B	Duet	No	BAD	7	37	11	7	45	21	5	NA
20140110	2	1	H	Duet	No	BAD	7	56	26	8	14	46	5	NA
20140110	2	2	A	Duet	No	BAD	8	6	55	NA	NA	NA	1	300
20140110	2	3	C	Duet	No	BAD	8	16	12	8	30	54	7	200
20140111	1	1	R	Duet	No	BAD	8	0	56	8	12	19	3	NA
20140111	1	2	M	Duet	Yes	BAD	8	16	30	8	31	45	7	350
20140111	2	1	ER	Duet	No	BAD	8	52	37	9	9	5	5	NA
20140111	2	2	W	Duet	No	BAD	9	9	40	9	20	6	2	400
20140111	3	1	W	Duet	No	BAD	9	39	13	9	42	10	1	NA
20140113	1	1	W	Duet	No	GOOD	6	51	5	6	59	8	3	NA
20140113	2	1	W	Duet	No	GOOD	7	15	56	NA	NA	NA	5	NA
20140113	3	1	S	Duet	No	GOOD	7	41	0	7	54	2	7	NA
20140113	3	2	E	Duet	No	GOOD	7	44	40	7	54	34	5	300
20140113	3	3	W	Duet	No	GOOD	7	55	23	8	14	34	7	400
20140113	4	1	ER	Duet	No	GOOD	8	56	25	9	12	42	5	NA
20140113	4	2	W	Duet	No	GOOD	9	8	54	9	18	45	1	200
20140113	4	3	NER	Duet	No	GOOD	9	23	8	9	29	32	3	600
20140113	5	1	W	Duet	No	BAD	9	52	16	10	8	36	4	NA
20140113	5	2	unk	Duet	No	BAD	10	5	18	NA	NA	NA	2	NA
20140116	1	1	H	Duet	No	GOOD	7	26	32	7	47	40	3	NA
20140116	1	2	C	Duet	No	GOOD	7	38	31	7	52	35	4	250
20140116	1	3	A	Duet	No	GOOD	7	48	22	8	5	41	7	500
20140116	2	1	H	Duet	No	GOOD	8	29	17	8	44	12	6	NA
20140116	3	1	R	Duet	Yes	GOOD	9	9	58	9	27	56	6	NA
20140116	3	2	H	Duet	Yes	GOOD	9	16	17	9	22	44	3	250
20140116	3	3	ER	Duet	No	GOOD	9	23	23	9	31	50	3	600
20140119	1	1	H	Duet	No	BAD	7	40	12	7	49	7	1	NA
20140119	2	1	H	Duet	No	BAD	9	5	48	9	11	53	1	NA
20140119	3	1	BD	Duet	No	BAD	10	4	29	10	7	26	2	NA
20140119	4	1	W	Duet	No	BAD	10	49	12	NA	NA	NA	1	NA
20140120	1	1	W	Duet	No	GOOD	7	2	49	7	29	24	6	NA
20140120	1	2	E	Duet	No	GOOD	7	6	54	7	16	56	4	400
20140120	1	3	M	Duet	No	GOOD	7	8	20	7	19	25	5	600
20140120	2	1	N	Duet	No	GOOD	7	45	34	8	4	19	4	NA
20140120	2	2	W	Duet	No	BAD	8	1	58	8	24	24	7	300
20140120	2	3	unk	Duet	No	BAD	8	15	47	NA	NA	NA	5	NA
20140121	1	1	W	Duet	No	BAD	9	55	40	10	26	52	10	NA
20140121	1	2	ER	Duet	No	BAD	10	11	42	NA	NA	NA	2	500
20140122	1	1	S	Duet	No	BAD	7	51	50	8	7	26	3	NA
20140122	1	2	W	Duet	No	BAD	7	55	0	NA	NA	NA	2	300
20140125	1	1	A	Duet	No	GOOD	7	5	34	7	43	10	19	NA
20140125	1	2	N	Duet	No	GOOD	7	17	35	7	35	35	5	300
20140125	1	3	B	Duet	No	GOOD	7	24	25	7	40	52	2	400
20140125	2	1	A	Duet	No	GOOD	9	2	36	9	10	35	3	NA
20140125	2	2	C	Duet	No	GOOD	9	11	2	9	28	7	8	500
20140125	2	3	H	Duet	No	GOOD	9	18	45	9	33	37	6	200
20140125	3	1	T	Duet	Yes	GOOD	12	4	0	12	16	22	4	NA
20140125	3	2	B	Duet	Yes	GOOD	12	9	5	12	32	23	10	200
20140125	3	3	C	Duet	Yes	GOOD	12	19	1	12	36	11	5	500
20140127	1	1	H	Duet	No	GOOD	7	42	18	7	59	27	4	NA
20140127	1	2	M	Duet	No	GOOD	8	1	43	8	22	29	6	300
20140127	1	3	ER	Duet	No	GOOD	8	3	28	8	24	50	6	50
20140127	2	1	R	Duet	No	GOOD	8	39	22	8	52	47	4	NA
20140127	2	2	ER	Duet	No	GOOD	8	45	16	8	49	20	1	300
20140127	3	1	S	Duet	No	GOOD	10	12	34	10	26	11	4	NA
20140128	1	1	N	Duet	Yes	GOOD	7	44	44	8	15	30	9	NA
20140128	1	2	S	Duet	Yes	GOOD	7	57	42	8	9	2	5	300
20140128	1	3	M	Duet	No	GOOD	8	3	13	8	14	38	6	350
20140128	2	1	H	Duet	No	GOOD	NA	NA	NA	NA	NA	NA	8	NA
20140128	2	2	M	Duet	No	GOOD	NA	NA	NA	NA	NA	NA	5	400
20140128	3	1	NER	Duet	No	GOOD	10	18	37	10	25	58	4	NA
20140129	1	1	W	Duet	No	GOOD	8	14	40	8	40	23	10	NA
20140129	1	2	ER	Duet	No	GOOD	8	14	55	8	34	24	6	250
20140129	2	1	M	Duet	Yes	GOOD	8	59	41	9	17	20	6	NA
20140129	2	2	A	Duet	No	GOOD	9	13	54	9	27	19	5	250
20140129	2	3	W	Duet	No	GOOD	9	33	3	NA	NA	NA	5	1400
20140129	3	1	W	Duet	No	GOOD	10	13	28	10	28	28	5	NA
20140129	3	2	S	Duet	No	GOOD	10	29	15	10	39	27	4	300
20140130	1	1	W	Duet	Yes	GOOD	7	10	59	7	54	24	15	NA
20140130	1	2	M	Duet	No	GOOD	7	56	11	8	9	50	5	500
20140130	2	1	ER	Duet	No	GOOD	8	39	5	8	42	55	1	NA
20140130	3	1	N	Duet	Yes	GOOD	9	22	9	9	43	43	6	NA
20140130	3	2	M	Duet	No	GOOD	9	39	34	9	46	15	2	200
20140130	4	1	W	Duet	No	GOOD	10	3	21	10	15	23	2	NA
20140130	5	1	ER	Duet	No	GOOD	10	46	12	10	49	51	3	NA
20140203	1	1	E	Duet	No	GOOD	7	10	31	7	31	18	5	NA
20140203	1	2	W	Duet	No	GOOD	7	37	39	8	5	35	6	600
20140203	1	3	ER	Duet	No	GOOD	7	49	16	7	52	52	3	200
20140203	2	1	H	Duet	Yes	GOOD	10	11	51	10	24	49	3	NA
20140203	2	2	A	Duet	No	GOOD	NA	NA	NA	NA	NA	NA	2	300
20140204	1	1	A	Duet	No	GOOD	8	8	46	8	22	25	5	NA
20140204	2	1	C	Duet	Yes	GOOD	8	44	44	9	3	14	8	NA
20140204	3	1	H	Duet	Yes	GOOD	11	6	16	11	22	14	7	NA
20140204	3	2	ER	Duet	No	GOOD	11	29	52	11	36	41	3	600
20140206	1	1	H	Duet	No	GOOD	7	50	34	8	1	33	3	NA
20140206	2	1	N	Duet	Yes	GOOD	8	15	41	8	27	28	5	NA
20140206	3	1	C	Duet	No	GOOD	8	40	55	8	53	10	6	NA
20140206	3	2	BD	Duet	No	GOOD	8	42	48	8	54	30	6	150
20140206	3	3	A	Duet	No	GOOD	8	54	58	9	17	52	11	600
20140206	4	1	T	Duet	No	GOOD	9	37	42	9	55	2	9	NA
20140206	5	1	E	Duet	No	GOOD	NA	NA	NA	NA	NA	NA	1	NA
20140207	1	1	ER	Duet	No	BAD	7	43	17	7	45	46	1	NA
20140207	2	1	H	Duet	No	BAD	9	24	10	9	28	15	1	NA
20140207	3	1	M	Duet	No	BAD	10	23	37	10	35	42	3	NA
20140207	4	1	H	Duet	No	BAD	10	52	24	10	55	14	1	NA
20140208	1	1	E	Duet	No	GOOD	NA	NA	NA	7	40	55	2	NA
20140208	2	1	ER	Duet	No	GOOD	7	59	29	8	26	22	9	NA
20140208	3	1	A	Duet	No	GOOD	9	18	8	9	32	2	8	1000
20140208	3	2	B	Duet	No	GOOD	9	23	30	9	46	22	6	600
20140208	3	3	C	Duet	No	GOOD	9	35	35	9	39	25	3	300
20140211	1	1	A	Duet	No	GOOD	7	38	53	7	46	38	2	NA
20140211	2	1	M	Duet	No	GOOD	7	58	16	8	10	15	4	NA
20140211	2	2	ER	Duet	No	GOOD	7	58	54	8	2	43	1	150
20140211	2	3	R	Duet	No	GOOD	8	11	5	8	17	11	3	700
20140211	3	1	ER	Duet	No	GOOD	9	31	31	9	33	1	1	NA
20140211	3	2	M	Duet	No	GOOD	9	33	14	9	35	6	1	400
20140211	4	1	ER	Duet	Yes	GOOD	10	22	46	10	30	39	2	NA
20140211	4	2	M	Duet	Yes	GOOD	10	27	56	10	36	9	3	250
20140211	5	1	H	Duet	Yes	GOOD	10	51	27	NA	NA	NA	4	NA
20140212	1	1	A	Duet	No	GOOD	8	54	52	9	8	0	6	NA
20140212	1	2	H	Duet	No	GOOD	8	58	14	9	10	39	4	200
20140212	1	3	N	Duet	Yes	GOOD	9	12	49	9	35	20	8	600
20140221	1	1	M	Duet	No	GOOD	7	38	12	7	53	6	5	NA
20140221	1	2	ER	Duet	No	GOOD	7	40	6	7	53	48	4	200
20140221	1	3	NER	Duet	Yes	GOOD	7	53	35	8	30	52	5	500
20140224	1	1	A	Duet	No	GOOD	7	59	57	8	2	35	2	NA
20140224	2	1	T	Duet	Yes	GOOD	9	50	18	9	56	32	3	NA
20140228	1	1	T	Duet	No	GOOD	7	12	16	7	28	3	7	NA
20140228	1	2	E	Duet	No	GOOD	7	31	7	7	44	48	6	300
20140228	1	3	BD	Duet	No	GOOD	7	46	21	7	50	50	4	400
20140228	2	1	T	Duet	No	GOOD	8	40	34	9	0	30	5	NA
20140301	1	1	N	Duet	No	GOOD	8	45	59	9	6	46	6	NA
20140301	1	2	A	Duet	No	GOOD	9	1	15	9	14	53	5	150
20140301	1	3	E	Duet	No	GOOD	9	20	56	9	33	23	4	600
20140301	2	1	T	Duet	No	GOOD	NA	NA	NA	NA	NA	NA	5	NA
20140303	1	1	C	Duet	No	GOOD	8	30	45	8	44	47	6	NA
20140303	1	2	T	Duet	No	GOOD	8	45	21	8	49	40	1	500
20140303	1	3	BD	Duet	No	GOOD	8	46	30	9	1	49	8	75
20140307	1	1	L	Duet	No	GOOD	7	43	4	8	2	1	5	NA
20140307	1	2	C	Duet	No	GOOD	8	8	19	8	25	16	8	400
20140307	2	1	NER	Duet	No	GOOD	8	53	18	NA	NA	NA	5	NA
20140307	2	2	R	Duet	No	GOOD	9	4	14	9	10	56	3	400
20140308	1	1	W	Duet	No	BAD	7	28	23	7	45	14	6	NA
20140308	1	2	ER	Duet	No	BAD	7	41	17	7	51	24	4	200
20140308	1	3	H	Duet	No	BAD	7	52	2	7	59	37	3	1000
20140308	2	1	ER	Duet	No	BAD	8	50	10	8	53	14	1	NA
20140308	2	2	E	Duet	No	BAD	8	55	50	9	1	42	3	700
20140308	3	1	T	Duet	No	BAD	9	43	5	10	2	6	8	NA
20140308	3	2	A	Duet	No	GOOD	9	51	59	10	9	23	4	200
20140308	4	1	T	Duet	No	GOOD	10	41	48	10	53	33	2	NA
20140310	1	1	C	Duet	No	GOOD	8	51	17	8	58	52	3	NA
20140310	1	2	H	Duet	No	GOOD	8	54	55	9	7	17	4	600
20140310	1	3	A	Duet	No	GOOD	9	13	19	9	20	33	4	400
20140310	2	1	C	Duet	No	GOOD	9	36	23	10	3	23	9	NA
20140310	2	2	A	Duet	No	GOOD	9	42	33	10	0	51	7	100
20140310	3	1	M	Duet	No	GOOD	10	11	10	10	19	32	5	NA
20140310	3	2	H	Duet	No	GOOD	10	21	34	10	36	29	4	500
20140311	1	1	H	Duet	No	GOOD	7	17	16	7	26	41	1	NA
20140311	1	2	C	Duet	No	GOOD	7	36	52	7	52	11	4	400
20140311	1	3	A	Duet	Yes	GOOD	7	42	47	8	3	4	3	200
20140311	2	1	H	Duet	No	GOOD	9	0	39	9	12	51	3	NA
20140311	2	2	NER	Duet	No	GOOD	9	11	16	9	21	20	4	350
20140312	1	1	N	Duet	No	GOOD	8	11	22	8	14	38	1	NA
20140312	1	2	A	Duet	No	GOOD	8	13	5	8	28	17	3	100
20140312	2	1	T	Duet	No	GOOD	8	43	57	8	51	24	1	NA
20140312	2	2	M	Duet	No	GOOD	8	57	1	9	14	16	7	500
20140314	1	1	G	Duet	No	GOOD	6	44	24	6	58	54	5	NA
20140314	2	1	A	Duet	No	GOOD	7	35	28	7	37	15	1	NA
20140314	3	1	T	Duet	No	GOOD	7	52	13	8	0	24	3	NA
20140314	3	2	B	Duet	No	GOOD	7	58	9	8	13	13	3	250
20140314	4	1	L	Duet	No	GOOD	9	3	40	9	22	42	7	NA
20140314	4	2	H	Duet	No	GOOD	9	19	3	9	24	57	1	250
20140317	1	1	M	Duet	No	GOOD	8	10	30	8	22	59	4	NA
20140318	1	1	A	Duet	No	GOOD	7	39	20	7	43	45	2	NA
20140318	2	1	H	Duet	No	GOOD	9	40	34	9	45	50	1	NA
20140318	3	1	A	Duet	No	GOOD	10	58	37	11	1	38	2	NA
20140320	1	1	W	Duet	No	GOOD	7	53	22	8	5	58	5	NA
20140320	1	2	ER	Duet	No	GOOD	8	7	21	8	17	28	4	500
20140320	1	3	R	Duet	No	GOOD	8	25	27	NA	NA	NA	3	350
20140320	2	1	A	Duet	No	GOOD	8	33	49	8	42	43	4	NA
20140320	3	1	A	Duet	No	GOOD	9	48	29	9	59	8	6	NA
20140320	3	2	C	Duet	No	GOOD	10	0	23	10	10	12	2	300
20140321	1	1	A	Duet	No	GOOD	6	33	5	6	35	28	1	NA
20140321	1	2	ER	Duet	No	GOOD	6	37	45	6	49	55	4	NA
20140321	1	3	W	Duet	No	GOOD	6	45	36	6	54	18	2	150
20140321	2	1	C	Duet	No	GOOD	7	8	48	7	20	3	3	NA
20140321	3	1	A	Duet	No	GOOD	7	46	31	8	8	45	8	NA
20140321	3	2	N	Duet	No	GOOD	NA	NA	NA	NA	NA	NA	3	200
20140321	4	1	R	Duet	No	GOOD	9	49	10	9	53	1	1	NA
20140321	5	1	M	Duet	No	GOOD	11	13	6	11	27	36	6	NA
20140321	6	1	W	Duet	No	GOOD	11	54	19	12	9	30	6	NA
20140324	1	1	H	Duet	Yes	GOOD	7	5	29	7	36	1	8	NA
20140324	1	2	NER	Duet	No	GOOD	7	35	30	7	47	5	3	600
20140324	1	3	R	Duet	No	GOOD	7	38	52	7	48	36	3	200
20140324	2	1	R	Duet	No	GOOD	8	33	9	8	40	18	2	NA
20140324	2	2	ER	Duet	No	GOOD	8	44	17	8	53	15	4	300
20140324	3	1	NER	Duet	No	GOOD	9	59	26	10	10	1	2	NA
20140324	3	2	ER	Duet	No	GOOD	10	11	36	10	18	24	4	150
20140325	1	1	A	Duet	No	GOOD	7	31	28	7	45	20	6	NA
20140325	1	2	N	Duet	No	GOOD	7	34	49	7	47	29	2	150
20140325	2	1	B	Duet	No	GOOD	8	36	15	8	48	58	2	NA
20140325	2	2	A	Duet	No	GOOD	8	58	10	9	13	32	5	400
20140325	2	3	T	Duet	No	GOOD	9	15	55	9	26	38	3	300
20140326	1	1	A	Duet	No	GOOD	7	21	37	7	27	18	4	NA
20140326	2	1	T	Duet	No	GOOD	8	3	15	8	27	15	7	NA
20140326	2	2	E	Duet	No	GOOD	8	17	44	8	38	52	7	200
20140328	1	1	BD	Duet	No	GOOD	7	30	59	7	42	10	4	NA
20140328	1	2	A	Duet	No	GOOD	7	34	42	7	35	29	1	100
20140328	2	1	C	Duet	No	GOOD	8	7	36	8	21	34	6	NA
20140328	2	2	BD	Duet	No	GOOD	8	14	23	8	28	30	6	200
20140328	2	3	T	Duet	No	GOOD	8	28	52	8	53	28	10	300
20140331	1	1	G	Duet	No	GOOD	7	37	17	7	57	28	4	NA
20140331	1	2	H	Duet	No	GOOD	7	41	24	8	0	49	4	200
20140331	2	1	M	Duet	No	GOOD	8	37	43	8	57	11	7	NA
20140331	2	2	NER	Duet	No	GOOD	8	47	57	8	58	0	4	250
20140331	2	3	R	Duet	No	GOOD	8	48	30	8	58	46	3	300
20140331	3	1	H	Duet	No	BAD	10	31	46	NA	NA	NA	6	NA
20140402	1	1	G	Duet	No	GOOD	6	55	4	7	22	12	11	NA
20140402	1	2	L	Duet	No	GOOD	7	18	49	7	25	59	6	200
20140402	1	3	H	Duet	No	GOOD	7	26	10	7	38	49	4	400
20140402	2	1	M	Duet	No	GOOD	9	40	1	9	50	41	4	NA
20140402	3	1	NER	Duet	Yes	GOOD	10	35	4	10	51	5	5	NA
20140402	3	2	R	Duet	Yes	GOOD	10	36	2	11	0	17	9	200
20140407	1	1	G	Duet	No	GOOD	7	18	24	7	28	22	4	NA
20140407	1	2	L	Duet	No	GOOD	7	25	4	7	43	3	5	200
20140407	1	3	H	Duet	No	GOOD	7	39	49	7	49	31	3	300
20140407	2	1	NER	Duet	No	GOOD	8	2	22	8	11	15	4	NA
20140407	2	2	ER	Duet	No	GOOD	8	10	42	8	20	13	4	100
20140407	3	1	ER	Duet	No	GOOD	9	27	25	9	28	58	1	NA
20140407	4	1	R	Duet	No	GOOD	10	19	35	10	28	22	3	NA
20140407	5	1	H	Duet	No	GOOD	10	45	47	10	50	28	3	NA
20140407	6	1	M	Duet	No	GOOD	12	10	54	18	18	29	3	NA
20140409	1	1	N	Duet	No	BAD	6	45	37	6	52	45	2	NA
20140409	1	2	ER	Duet	No	BAD	6	47	53	6	53	21	1	100
20140409	2	1	N	Duet	No	BAD	NA	NA	NA	NA	NA	NA	3	NA
20140409	3	1	W	Duet	Yes	BAD	8	51	5	9	17	9	12	NA
20140409	3	2	unk	Duet	No	BAD	9	1	56	9	14	20	3	250
20140411	1	1	L	Duet	No	GOOD	6	36	20	6	50	49	7	NA
20140411	1	2	H	Duet	No	GOOD	6	55	12	7	10	9	2	400
20140411	1	3	G	Duet	No	GOOD	7	13	23	NA	NA	NA	1	300
20140411	2	1	NER	Duet	No	GOOD	7	28	31	7	42	25	5	NA
20140411	2	2	R	Duet	No	GOOD	7	38	0	7	44	49	2	200
20140411	3	1	G	Duet	No	GOOD	8	27	33	8	45	3	5	NA
20140411	3	2	R	Duet	No	GOOD	8	32	16	8	49	25	6	200
20140411	3	3	L	Duet	No	GOOD	8	48	22	9	6	48	4	600
20140411	4	1	H	Duet	No	GOOD	9	55	54	10	4	59	4	NA
20140411	4	2	M	Duet	No	GOOD	10	14	50	10	22	51	4	500
20140414	1	1	H	Duet	No	BAD	6	46	26	6	54	28	2	NA
20140415	1	1	T	Duet	No	GOOD	7	54	43	8	9	57	5	NA
20140415	1	2	BD	Duet	No	GOOD	8	19	40	8	31	18	5	400
20140415	2	1	N	Duet	No	GOOD	8	52	11	9	10	17	8	NA
20140415	2	2	A	Duet	No	GOOD	8	59	42	9	8	46	4	100
20140416	1	1	T	Duet	No	GOOD	7	31	43	7	44	22	4	NA
20140416	2	1	A	Duet	No	GOOD	8	17	30	8	31	44	8	NA
20140416	2	2	N	Duet	No	GOOD	8	28	55	8	38	4	4	150
20140416	3	1	C	Duet	No	GOOD	9	31	13	9	37	36	3	NA
20140416	3	2	B	Duet	No	GOOD	9	43	29	10	15	52	12	600
20140416	3	3	BD	Duet	No	GOOD	10	3	45	10	20	49	7	250
20140417	1	1	W	Duet	No	GOOD	NA	NA	NA	9	18	0	6	NA
20140417	1	2	NOS	Duet	No	GOOD	NA	NA	NA	NA	NA	NA	4	150
20140420	1	1	T	Duet	No	GOOD	6	48	23	6	59	25	5	NA
20140420	2	1	B	Duet	No	GOOD	7	27	42	7	37	47	3	NA
20140420	2	2	A	Duet	No	GOOD	7	30	31	7	37	11	2	200
20140420	2	3	H	Duet	No	GOOD	7	36	45	7	50	34	5	300
20140420	3	1	C	Duet	No	GOOD	NA	NA	NA	NA	NA	NA	3	NA
20140420	4	1	H	Duet	No	GOOD	10	38	13	10	42	52	1	NA
20140422	1	1	ER	Duet	No	GOOD	6	58	9	7	5	27	4	NA
20140422	2	1	NOS	Duet	No	GOOD	7	36	49	7	54	56	11	NA
20140422	2	2	S	Duet	No	GOOD	7	51	23	7	52	29	1	150
20140422	3	1	ES	Duet	No	GOOD	8	14	7	8	24	38	4	NA
20140422	3	2	S	Duet	No	GOOD	8	15	19	8	31	16	7	100
20140425	1	1	A	Duet	No	GOOD	6	40	40	6	46	46	1	NA
20140425	1	2	NER	Duet	No	GOOD	6	48	11	7	0	59	4	1000
20140425	2	1	A	Duet	Yes	GOOD	7	29	44	7	47	4	5	NA
20140425	2	2	H	Duet	Yes	GOOD	7	32	29	7	49	27	9	200
20140425	2	3	R	Duet	No	GOOD	7	34	58	7	52	20	5	100
20140425	3	1	R	Duet	Yes	GOOD	8	47	16	9	13	39	7	NA
20140425	3	2	unk	Duet	Yes	GOOD	9	2	10	9	10	17	4	NA
20140425	4	1	H	Duet	No	GOOD	10	18	28	10	22	54	1	NA
20140425	4	2	M	Duet	No	GOOD	NA	NA	NA	NA	NA	NA	6	200
20140429	1	1	BD	Duet	Yes	GOOD	10	5	52	10	19	38	8	NA
20140429	1	2	A	Duet	No	GOOD	10	16	53	10	29	40	7	200
20140429	1	3	N	Duet	Yes	GOOD	10	28	18	10	33	34	5	500
20140429	2	1	A	Duet	No	GOOD	11	10	56	11	22	37	8	NA
20140429	2	2	BD	Duet	No	GOOD	11	22	48	11	43	41	9	200
20140429	2	3	B	Duet	Yes	GOOD	11	34	19	11	54	53	14	200
20140430	2	1	W	Duet	No	GOOD	7	4	45	7	13	17	3	NA
20140430	1	2	ER	Duet	No	GOOD	7	8	57	7	17	1	5	200
20140430	1	3	M	Duet	No	GOOD	7	17	7	7	21	40	1	400
20140501	1	1	A	Duet	Yes	GOOD	7	10	2	7	23	2	4	NA
20140501	2	1	T	Duet	Yes	GOOD	7	46	16	7	52	42	2	NA
20140501	2	2	BD	Duet	Yes	GOOD	7	50	31	8	5	36	7	250
20140501	3	1	T	Duet	Yes	GOOD	8	21	2	8	36	56	6	NA
20140501	3	2	BD	Duet	Yes	GOOD	8	37	11	8	48	30	6	350
20140501	3	3	A	Duet	No	GOOD	8	39	17	8	44	48	4	150
20140501	4	1	T	Duet	No	GOOD	9	27	28	9	36	56	3	NA
20140501	5	1	B	Duet	No	GOOD	10	2	30	10	27	7	13	NA
20140501	5	2	BD	Duet	No	GOOD	10	4	7	10	16	9	6	100
20140502	1	1	A	Duet	No	GOOD	6	22	17	NA	NA	NA	4	NA
20140502	2	1	A	Duet	No	GOOD	7	14	21	7	40	5	8	NA
20140502	2	2	H	Duet	No	GOOD	7	23	30	7	37	32	5	150
20140502	3	1	M	Duet	No	GOOD	8	8	13	8	20	47	5	NA
20140502	3	2	N	Duet	No	GOOD	8	13	29	8	26	12	2	300
20140502	3	3	A	Duet	Yes	GOOD	8	32	59	8	58	43	11	500
20140505	1	1	A	Duet	No	GOOD	6	40	6	7	6	41	6	NA
20140505	1	2	H	Duet	No	GOOD	7	3	55	7	20	20	5	200
20140505	2	1	R	Duet	No	GOOD	8	24	5	8	32	29	2	NA
20140505	3	1	NER	Duet	No	GOOD	8	53	27	9	7	45	6	NA
20140505	3	2	ER	Duet	No	GOOD	9	9	9	9	17	35	2	400
20140505	4	1	ER	Duet	No	GOOD	10	57	29	11	7	21	5	NA
20140505	4	2	R	Duet	No	GOOD	11	14	26	11	31	31	5	500
20140506	1	1	M	Duet	No	GOOD	NA	NA	NA	NA	NA	NA	5	NA
20140506	1	2	R	Duet	No	GOOD	NA	NA	NA	NA	NA	NA	1	600
20140506	2	1	A	Duet	No	GOOD	7	44	24	7	57	16	5	NA
20140506	2	2	H	Duet	No	GOOD	7	48	12	7	56	34	3	150
20140506	3	1	G	Duet	No	GOOD	8	54	19	9	6	40	2	NA
20140506	3	2	H	Duet	No	GOOD	9	1	26	9	12	17	3	300
20140509	1	1	N	Duet	No	GOOD	6	30	15	6	47	14	4	NA
20140509	1	2	C	Duet	No	GOOD	6	52	59	7	8	1	3	800
20140509	1	3	A	Duet	No	GOOD	7	9	49	7	15	3	2	500
20140509	2	1	A	Duet	Yes	GOOD	7	47	14	8	14	44	9	NA
20140509	2	2	H	Duet	Yes	GOOD	7	58	35	8	16	10	7	100
20140509	2	3	C	Duet	Yes	GOOD	8	15	13	8	29	45	5	600
20140514	1	1	NER	Duet	No	GOOD	6	42	47	6	55	15	6	NA
20140514	1	2	ER	Duet	No	GOOD	6	49	48	6	59	57	3	250
20140514	1	3	M	Duet	No	GOOD	6	56	30	7	11	57	4	300
20140514	2	1	H	Duet	Yes	GOOD	10	22	41	10	37	13	4	NA
20140514	2	2	A	Duet	No	GOOD	10	26	53	10	35	44	3	250
20140514	2	3	R	Duet	No	GOOD	10	36	10	10	40	39	1	700
20140514	3	1	ER	Duet	No	GOOD	11	25	2	NA	NA	NA	1	NA
20140515	1	1	A	Duet	No	GOOD	6	9	56	6	25	53	4	NA
20140515	1	2	N	Duet	No	GOOD	6	18	25	6	26	44	3	200
20140516	1	1	M	Duet	No	GOOD	6	20	7	6	31	19	4	NA
20140516	1	2	C	Duet	No	GOOD	6	36	55	6	49	14	6	900
20140516	2	1	H	Duet	No	GOOD	7	55	28	8	7	48	5	NA
20140516	2	2	A	Duet	No	GOOD	7	56	18	8	4	33	4	100
20140516	3	1	C	Duet	No	GOOD	10	7	15	10	24	8	8	NA
20140516	4	1	A	Duet	No	GOOD	10	41	24	10	55	15	5	NA
20140516	4	2	H	Duet	No	GOOD	10	59	28	11	12	32	4	400
20140520	1	1	L	Duet	No	GOOD	6	18	1	NA	NA	NA	2	NA
20140520	1	2	H	Duet	No	GOOD	6	22	56	6	38	46	3	200
20140520	2	1	L	Duet	No	GOOD	7	18	43	7	20	15	1	NA
20140521	1	1	A	Duet	No	BAD	6	7	47	6	8	34	1	NA
20140521	1	2	T	Duet	No	BAD	6	15	4	6	21	49	2	600
20140521	2	1	BD	Duet	No	BAD	6	46	18	6	50	1	1	NA
20140522	1	1	ES	Duet	No	GOOD	6	0	3	6	15	7	5	NA
20140522	1	2	NOS	Duet	No	GOOD	6	2	53	6	14	31	5	300
20140522	1	3	S	Duet	No	GOOD	6	17	12	6	29	12	6	600
20140522	2	1	N	Duet	No	GOOD	6	57	44	7	8	24	8	NA
20140522	2	2	W	Duet	No	GOOD	7	0	52	7	19	19	7	200
20140522	2	3	S	Duet	No	GOOD	7	8	39	7	33	42	9	500
20140528	1	1	BD	Duet	No	GOOD	6	19	40	6	35	36	2	NA
20140528	1	2	T	Duet	No	GOOD	6	30	21	NA	NA	NA	6	200
20140528	1	3	B	Duet	No	GOOD	6	48	58	7	1	41	5	150
20140528	2	1	C	Duet	Yes	GOOD	7	37	45	NA	NA	NA	7	NA
20140528	3	1	T	Duet	Yes	GOOD	8	22	52	8	40	10	4	NA
20140528	3	2	B	Duet	Yes	GOOD	8	23	6	8	52	38	11	200
20140528	3	3	BD	Duet	No	GOOD	8	52	14	9	5	1	7	200
20140601	1	1	BD	Duet	No	GOOD	7	26	18	7	43	9	9	400
20140601	1	2	E	Duet	No	GOOD	7	43	19	7	53	44	6	400
20140601	2	1	B	Duet	No	GOOD	8	50	4	9	11	39	10	NA
20140604	1	1	B	Duet	No	GOOD	6	8	58	6	30	56	10	NA
20140604	1	2	BD	Duet	No	GOOD	6	10	48	6	28	32	11	NA
20140504	2	1	E	Duet	Yes	GOOD	7	45	44	NA	NA	NA	2	NA
20140604	2	2	T	Duet	Yes	GOOD	7	49	51	8	16	28	7	200
20140604	3	1	BD	Duet	Yes	GOOD	9	14	56	9	24	1	7	NA
20140605	1	1	N	Duet	No	GOOD	6	17	13	6	32	12	4	NA
20140605	1	2	W	Duet	Yes	GOOD	6	22	16	6	47	32	8	300
20140605	1	3	NOS	Duet	No	GOOD	6	43	56	6	55	12	8	200
20140605	2	1	NOS	Duet	No	GOOD	8	31	22	8	35	5	2	NA
20140605	2	2	W	Duet	Yes	GOOD	8	41	18	8	54	5	4	400
20140605	2	3	NOS	Duet	Yes	GOOD	8	48	10	9	2	29	12	200
20140608	1	1	W	Duet	Yes	GOOD	8	24	35	8	47	57	8	NA
20140608	2	1	W	Duet	No	GOOD	9	9	55	9	16	25	2	NA
20140608	3	1	M	Duet	No	GOOD	10	20	13	NA	NA	NA	3	NA
20140610	1	1	NOS	Duet	No	GOOD	6	0	5	6	13	43	4	NA
20140610	1	2	W	Duet	No	GOOD	6	12	1	6	31	19	9	200
20140610	2	1	S	Duet	No	GOOD	8	15	7	8	28	40	6	NA
20140611	1	1	W	Duet	No	GOOD	6	31	18	6	47	53	6	NA
20140611	1	2	unk	Duet	No	GOOD	6	36	37	NA	NA	NA	2	200
20140611	2	1	S	Duet	No	GOOD	7	24	54	7	34	19	5	NA
20140611	3	1	W	Duet	No	GOOD	7	49	43	8	25	38	12	NA
20140611	3	2	NOS	Duet	No	GOOD	8	5	21	8	19	17	8	150
20140611	3	3	S	Duet	No	GOOD	8	18	40	8	34	37	8	200
20140611	4	1	S	Duet	No	GOOD	9	58	7	10	10	59	5	NA
20140613	1	1	ER	Duet	No	GOOD	6	59	11	7	4	27	2	NA
20140613	2	1	W	Duet	No	GOOD	7	26	23	7	56	21	12	NA
20140613	2	2	N	Duet	No	GOOD	7	52	30	8	8	29	3	250
20140613	2	3	M	Duet	No	GOOD	7	59	17	8	14	21	3	300
20140613	3	1	NOS	Duet	No	GOOD	9	18	11	NA	NA	NA	3	NA
20140707	1	1	E	Duet	No	GOOD	6	35	31	6	48	40	6	NA
20140707	1	2	T	Duet	No	GOOD	6	37	44	6	56	17	4	200
20140707	2	1	A	Duet	No	GOOD	7	21	19	7	31	38	4	NA
20140707	3	1	T	Duet	No	GOOD	8	43	55	8	58	50	7	NA
20140707	3	2	E	Duet	No	GOOD	8	48	28	9	6	13	6	200
20140707	3	3	A	Duet	No	GOOD	9	0	51	9	8	35	5	700
20140708	1	1	E	Duet	No	GOOD	7	53	36	8	12	12	9	NA
20140708	1	2	unk	Duet	No	GOOD	7	58	34	8	14	31	5	NA
20140708	1	3	W	Duet	No	GOOD	8	12	54	8	22	50	6	NA
20140708	2	1	M	Duet	No	GOOD	8	52	41	9	5	53	5	NA
20140708	2	2	N	Duet	No	GOOD	9	3	3	9	15	38	3	300
20140708	2	3	A	Duet	No	GOOD	9	21	51	9	36	48	9	500
20140708	3	1	A	Duet	No	GOOD	10	53	10	10	57	46	3	NA
20140710	1	1	T	Duet	No	GOOD	7	27	48	7	39	56	2	NA
20140710	1	2	E	Duet	No	GOOD	7	36	3	7	46	43	5	200
20140710	2	1	NOS	Duet	No	BAD	9	55	58	NA	NA	NA	2	NA
20140713	1	1	N	Duet	No	GOOD	NA	NA	NA	NA	NA	NA	5	NA
20140713	1	2	E	Duet	No	GOOD	NA	NA	NA	NA	NA	NA	6	100
20140713	2	1	T	Duet	No	GOOD	9	6	59	9	29	59	5	NA
20140713	2	2	E	Duet	No	GOOD	9	9	3	9	37	34	10	150
20140713	2	3	M	Duet	No	GOOD	NA	NA	NA	NA	NA	NA	4	1000
20140714	1	1	S	Duet	No	BAD	NA	NA	NA	NA	NA	NA	5	NA
20140715	1	1	NOS	Duet	No	GOOD	7	25	8	7	46	41	5	NA
20140715	1	2	W	Duet	No	GOOD	7	29	30	7	44	22	3	200
20140715	1	3	N	Duet	No	GOOD	7	41	29	7	59	12	3	250
20140715	2	1	NOS	Duet	No	GOOD	NA	NA	NA	NA	NA	NA	1	NA
20140715	3	1	M	Duet	No	GOOD	11	10	51	NA	NA	NA	2	NA
20140717	1	1	A	Duet	No	GOOD	6	26	37	6	28	48	1	NA
20140717	1	2	ER	Duet	No	GOOD	6	32	22	6	39	2	3	900
20140717	2	1	A	Duet	No	GOOD	6	59	18	7	15	8	4	NA
20140717	2	2	H	Duet	No	GOOD	7	12	16	7	24	13	5	200
20140717	2	3	ER	Duet	No	GOOD	7	23	26	7	36	38	6	800
20140717	3	1	E	Duet	No	GOOD	8	21	12	8	35	10	4	NA
20140717	3	2	N	Duet	No	GOOD	8	24	52	8	56	32	10	300
20140717	4	1	unk	Duet	No	GOOD	NA	NA	NA	NA	NA	NA	6	NA
20140717	4	2	M	Duet	No	GOOD	9	14	25	9	30	45	4	NA
20140718	1	1	C	Duet	No	GOOD	7	54	52	7	56	6	1	NA
20140718	1	2	BD	Duet	No	GOOD	7	58	47	8	17	22	6	500
20140718	2	1	BD	Duet	No	BAD	9	37	9	9	43	56	4	NA
20140718	2	2	A	Duet	No	BAD	9	42	57	10	0	9	9	200
20140721	1	1	M	Duet	No	GOOD	NA	NA	NA	NA	NA	NA	2	NA
20140721	2	1	M	Duet	No	GOOD	NA	NA	NA	NA	NA	NA	4	NA
20140721	3	1	BD	Duet	No	GOOD	NA	NA	NA	NA	NA	NA	6	NA
20140721	3	2	C	Duet	No	GOOD	NA	NA	NA	NA	NA	NA	6	150
20140721	3	3	A	Duet	No	GOOD	NA	NA	NA	NA	NA	NA	8	250
20140721	4	1	C	Duet	No	GOOD	NA	NA	NA	NA	NA	NA	4	NA
20140722	1	1	A	Duet	No	GOOD	NA	NA	NA	NA	NA	NA	9	NA
20140722	1	2	T	Duet	No	GOOD	NA	NA	NA	NA	NA	NA	3	300
20140722	2	1	E	Duet	No	GOOD	8	26	12	8	40	12	2	NA
20140722	2	2	T	Duet	No	GOOD	8	30	27	8	45	41	4	200
20140722	2	3	M	Duet	Yes	GOOD	8	48	52	9	12	52	10	1300
20140722	3	1	unk	Duet	No	GOOD	10	4	8	NA	NA	NA	1	NA
20140722	3	2	ER	Duet	No	GOOD	10	7	16	10	20	47	4	NA
20140722	4	1	unk	Duet	No	GOOD	NA	NA	NA	NA	NA	NA	5	NA
20140723	1	1	A	Duet	No	GOOD	NA	NA	NA	NA	NA	NA	7	NA
20140723	1	2	BD	Duet	No	GOOD	NA	NA	NA	NA	NA	NA	2	200
20140723	2	1	BD	Duet	No	GOOD	8	10	23	8	20	4	5	NA
20140723	2	2	B	Duet	Yes	GOOD	8	20	57	NA	NA	NA	10	300
20140724	1	1	A	Duet	No	GOOD	NA	NA	NA	NA	NA	NA	6	NA
20140724	1	2	T	Duet	No	GOOD	NA	NA	NA	NA	NA	NA	1	500
20140724	1	3	BD	Duet	No	GOOD	NA	NA	NA	NA	NA	NA	7	200
20140724	2	1	A	Duet	No	GOOD	NA	NA	NA	NA	NA	NA	12	NA
20140724	2	2	C	Duet	No	GOOD	NA	NA	NA	NA	NA	NA	5	200
20140724	3	1	BD	Duet	No	GOOD	9	27	59	10	9	56	6	NA
20140724	3	2	T	Duet	Yes	GOOD	9	43	39	10	2	39	6	300
20140724	3	3	B	Duet	No	BAD	9	44	32	10	7	8	11	150
20140724	4	1	H	Duet	No	BAD	10	59	18	11	6	15	2	NA
20140724	4	2	T	Duet	Yes	BAD	11	6	58	11	27	18	6	1300
20140724	4	3	BD	Duet	No	BAD	11	11	14	11	17	15	1	200
20140727	1	1	BD	Duet	No	BAD	NA	NA	NA	NA	NA	NA	2	NA
20140727	2	1	B	Duet	No	BAD	NA	NA	NA	NA	NA	NA	1	NA
20140727	3	1	A	Duet	No	BAD	8	59	53	9	9	48	6	NA
20140727	3	2	B	Duet	No	BAD	9	10	26	9	16	43	3	300
20140728	1	1	A	Duet	No	GOOD	6	35	26	6	56	31	11	NA
20140728	1	2	T	Duet	No	GOOD	6	45	0	6	58	59	5	300
20140728	1	3	BD	Duet	No	GOOD	6	54	29	7	20	22	9	400
20140728	2	1	BD	Duet	Yes	GOOD	8	3	11	8	17	33	6	NA
20140728	1	1	unk	Duet	No	GOOD	7	23	39	NA	NA	NA	5	NA
20140730	1	2	ER	Duet	No	GOOD	7	23	59	NA	NA	NA	9	NA
20140730	2	1	M	Duet	No	GOOD	9	5	13	9	12	36	3	NA
20140730	2	2	H	Duet	No	GOOD	NA	NA	NA	NA	NA	NA	4	400
20140730	3	1	H	Duet	Yes	GOOD	9	37	46	9	52	52	5	NA
20140730	3	2	A	Duet	Yes	GOOD	9	55	49	NA	NA	NA	15	400
20140801	1	1	H	Duet	No	GOOD	7	29	5	7	39	4	3	NA
20140801	1	2	R	Duet	No	GOOD	7	47	42	7	51	33	1	NA
20140801	2	1	G	Duet	No	GOOD	8	40	50	9	0	36	3	NA
20140802	1	1	NOS	Duet	No	GOOD	6	55	1	7	6	34	8	NA
20140802	1	2	S	Duet	No	GOOD	7	6	44	7	11	55	3	400
20140802	2	1	W	Duet	No	GOOD	7	33	50	7	41	21	4	NA
20140802	2	2	N	Duet	No	GOOD	7	39	54	8	0	51	8	300
20140806	1	1	T	Duet	No	GOOD	8	20	0	8	26	48	4	NA
20140806	1	2	A	Duet	No	GOOD	8	36	9	8	48	50	9	800
20140806	1	3	B	Duet	No	GOOD	8	43	48	9	3	39	7	200
20140808	1	1	S	Duet	No	BAD	6	52	35	7	4	9	5	NA
20140808	1	2	NOS	Duet	No	BAD	6	58	9	7	10	12	6	200
20140809	1	1	N	Duet	No	GOOD	NA	NA	NA	NA	NA	NA	2	NA
20140809	2	1	ER	Duet	No	GOOD	NA	NA	NA	NA	NA	NA	1	NA
20140809	2	2	H	Duet	No	GOOD	NA	NA	NA	NA	NA	NA	6	1000
20140809	2	3	A	Duet	No	GOOD	NA	NA	NA	NA	NA	NA	9	200
20140809	3	1	M	Duet	No	GOOD	8	31	54	8	56	29	8	NA
20140809	3	2	N	Duet	No	GOOD	8	46	36	9	5	32	6	150
20140809	4	1	H	Duet	No	GOOD	9	36	47	9	47	56	3	NA
20140809	4	2	A	Duet	No	GOOD	9	41	10	9	48	56	3	150
20140810	1	1	A	Duet	No	GOOD	6	44	11	6	56	12	5	NA
20140810	1	2	B	Duet	No	GOOD	6	54	10	7	8	33	5	300
20140810	1	3	BD	Duet	No	GOOD	7	2	32	7	11	13	5	150
20140810	2	1	R	Duet	No	GOOD	NA	NA	NA	NA	NA	NA	5	NA
20140810	2	2	ER	Duet	No	GOOD	NA	NA	NA	NA	NA	NA	2	NA
20140810	NA	2	A	NA	No	GOOD	NA	NA	NA	NA	NA	NA	7	400
20140810	3	1	C	Duet	No	GOOD	9	16	22	9	19	12	3	NA
20140811	1	1	N	Duet	No	GOOD	NA	NA	NA	NA	NA	NA	3	NA
20140811	1	2	M	Duet	No	GOOD	NA	NA	NA	NA	NA	NA	1	NA
20140811	2	1	S	Duet	No	GOOD	7	54	46	7	56	51	1	NA
20140811	3	1	N	Duet	No	GOOD	NA	NA	NA	NA	NA	NA	4	NA
20140812	1	1	S	Duet	No	GOOD	NA	NA	NA	NA	NA	NA	2	NA
20140812	2	1	W	Duet	Yes	GOOD	7	10	3	7	47	59	13	NA
20140812	2	2	N	Duet	Yes	BAD	7	10	43	7	44	6	12	400
20140812	3	1	N	Duet	No	BAD	NA	NA	NA	10	3	11	2	NA
20140812	3	2	W	Duet	No	BAD	9	53	20	10	14	49	8	300
20140814	2	1	A	Duet	No	BAD	NA	NA	NA	NA	NA	NA	5	NA
20140816	1	1	C	Duet	No	BAD	NA	NA	NA	NA	NA	NA	4	NA
20140816	2	1	A	Duet	No	BAD	8	20	19	8	24	29	1	NA
20140816	3	1	C	Duet	No	BAD	9	6	19	9	11	17	2	NA
20140816	3	2	E	Duet	No	BAD	9	12	5	9	35	32	5	1000
20140816	3	3	T	Duet	No	BAD	9	20	15	9	29	23	5	200
20140817	1	1	BD	Duet	No	GOOD	NA	NA	NA	NA	NA	NA	5	NA
20140817	2	1	A	Duet	No	GOOD	NA	NA	NA	NA	NA	NA	4	NA
20140817	2	2	E	Duet	No	GOOD	8	42	30	8	45	43	2	900
20140818	1	1	A	Duet	No	BAD	NA	NA	NA	NA	NA	NA	4	NA
20140818	1	2	unk	Duet	No	BAD	NA	NA	NA	NA	NA	NA	4	NA
20140818	2	1	E	Duet	No	BAD	8	16	10	8	20	24	4	NA
20140818	2	2	T	Duet	No	BAD	8	20	58	8	24	22	1	100
20140819	1	1	BD	Duet	No	BAD	NA	NA	NA	NA	NA	NA	2	NA
20140819	2	1	B	Duet	No	BAD	7	41	25	8	14	31	11	NA
20140819	2	2	BD	Duet	No	BAD	8	0	55	8	16	30	6	200
20140819	3	1	E	Duet	No	BAD	NA	NA	NA	NA	NA	NA	8	NA
20140820	1	1	E	Duet	No	GOOD	NA	NA	NA	NA	NA	NA	8	NA
20140820	2	1	A	Duet	No	GOOD	NA	NA	NA	NA	NA	NA	7	NA
20140820	2	2	H	Duet	No	GOOD	NA	NA	NA	NA	NA	NA	3	200
20140820	3	1	T	Duet	No	GOOD	NA	NA	NA	NA	NA	NA	8	NA
20140820	3	2	B	Duet	No	GOOD	NA	NA	NA	NA	NA	NA	5	150
20140820	3	3	A	Duet	No	GOOD	NA	NA	NA	NA	NA	NA	11	400
20140820	4	1	C	Duet	No	GOOD	9	40	47	9	54	19	6	NA
20140820	4	2	A	Duet	No	GOOD	9	44	30	9	57	59	5	200
20140821	1	1	C	Duet	No	GOOD	NA	NA	NA	NA	NA	NA	5	NA
20140821	2	1	A	Duet	No	GOOD	7	19	47	7	31	56	5	NA
20140821	2	2	H	Duet	No	GOOD	7	25	1	7	32	0.27	2	200
20140821	3	1	ER	Duet	No	GOOD	8	55	43	9	5	33	4	NA
20140821	3	2	M	Duet	No	GOOD	9	2	33	9	15	17	5	250
20140821	3	3	H	Duet	No	GOOD	9	5	45	9	14	44	3	100
20140821	4	1	R	Duet	No	GOOD	10	21	20	10	30	13	4	NA
20140821	5	1	M	Duet	No	GOOD	NA	NA	NA	NA	NA	NA	4	NA

## Sheet: Genetic
		A		B		C		E		H		M		N		R		S		T		W			BD		NOS
		AF	AM1	AM1	AF	AM1	AF	AM1	AF	AM1	AF	AM1	AF	AM1	AF	AM1	AF	AM1	AF	AM1	AF	AM1	AF	AM2	AM1	AF	AM1	AF
A	AF	1
	AM1	0	1
B	AM1	0	K	1	0
	AF	0	0	0	1
C	AM1	0	0	0	0	1
	AF	0	0	0	0	0	1
E	AM1	0	0	0	0	0	0	1
	AF	0	0	0	0	0	0	0	1
H	AM1	0	0	0	0	0	0	0	0	1
	AF	0	0	0	0	0	0	0	0	0	1
M	AM1	0	K	K	0	0	0	0	0	0	0	1
	AF	0	0	0	0	0	0	0	0	0	0	0	1
N	AM1	0	0	0	0	0	0	K	0	0	0	0	0	1
	AF	0	0	0	0	0	0	0	0	K	K	0	0	0	1
R	AM1	0	0	0	0	0	0	0	0	K	K	0	0	0	K	1
	AF	0	0	0	0	0	0	0	0	0	0	0	K	0	0	0	1
S	AM1	0	0	0	0	0	0	0	0	0	0	0	0	0	0	0	0	1
	AF	0	0	0	0	0	0	0	0	0	0	0	0	0	0	0	0	0	1
T	AM1	K	0	0	0	0	0	0	0	0	0	0	0	0	0	0	0	0	0	1
	AF	0	0	0	0	0	0	0	0	0	0	0	0	0	0	0	0	0	0	0	1
W*	AM1	0	0	0	0	0	0	0	0	0	0	0	0	0	0	0	0	0	0	0	0	1
	AF	0	0	0	0	0	0	0	0	0	0	0	0	0	0	0	0	K	K	0	0	0	1
	AM2	0	0	0	0	0	0	0	0	0	0	0	0	0	0	0	0	0	0	0	0	0.5	0	1
BD	AM1	0	K	K	0	0	0	0	0	0	0	K	0	0	0	0	0	0	0	0	0	0	0	0	1
	AF	0	0	0	0	0	0	0	0	0	0	0	0	0	0	0	0	0	0	0	0	0	0	0	0	1
NOS	AM1	0	0	0	0	0	0	0	0	0	0	0	0	0	0	0	0	K	K	0	0	0	K	0	0	0	1
	AF	0	0	0	0	0	0	0	0	0	0	0	0	0	0	0	0	0	0	0	0	0	0	0	0	0	0	1
*AM2 replaced AM1 as primary male April 2014
K= kin
0= non-kin

## Sheet: Social
group	from	to	male_composition
A	20121218	20140401	single
A	20140402	20140822	multi
B	20121218	20140822	multi
C	20121218	20140822	single
D	20121218	20140822	single
E	20121218	20140822	single
H	20121218	20140822	single
M	20121218	20140822	single
N	20121218	20140822	multi
R	20121218	20140822	single
S	20121218	20140822	single
T	20121218	20140822	single
W	20121218	20140822	multi
NOS	20121218	20140822	multi
BD	20121218	20140822	single

## Sheet: Spatial
group 1	group 2	mini_distance	centroid_distance	maxi_distance	neighbours	encounter_number
A	B	0	812	1700	Yes	2
A	C	0	796	1782	Yes	5
A	E	499	1387	2216	No	NA
A	H	0	973	1979	Yes	0
A	M	399	1391	2400	No	NA
A	N	0	1149	2261	Yes	4
A	R	952	2007	3140	No	NA
A	S	1761	2773	3812	No	NA
A	T	300	1126	1985	No	NA
A	W	1316	2320	3442	No	NA
A	BD	0	797	1649	Yes	0
A	NOS	1931	2860	3807	No	NA
B	C	396	1177	2035	No	NA
B	E	360	1046	1766	No	NA
B	H	1049	1792	2605	No	NA
B	M	1173	2051	2880	No	NA
B	N	632	1546	2443	No	NA
B	R	1895	2781	3719	No	NA
B	S	1942	2840	3637	No	NA
B	T	0	468	1373	Yes	4
B	W	1724	2674	3646	No	NA
B	BD	0	406	1044	Yes	3
B	NOS	2336	3124	3909	No	NA
C	E	1314	2092	2907	No	NA
C	H	290	1201	2195	Yes	0
C	M	1010	1984	2948	No	NA
C	N	866	1931	2941	No	NA
C	R	1224	2240	3300	No	NA
C	S	2598	3579	4474	No	NA
C	T	876	1646	2607	No	NA
C	W	2056	3074	4096	No	NA
C	BD	0	877	1808	Yes	1
C	NOS	2768	3632	4485	No	NA
E	H	1345	2157	2913	No	NA
E	M	1166	1953	2726	No	NA
E	N	0	1179	1982	Yes	2
E	R	2079	2940	3745	No	NA
E	S	1004	1878	2703	No	NA
E	T	0	677	1560	Yes	3
E	W	1158	2019	2997	No	NA
E	BD	940	1459	2058	No	NA
E	NOS	1151	2346	3002	No	NA
H	M	0	938	1980	Yes	1
H	N	293	1330	2378	No	NA
H	R	0	1073	2093	Yes	2
H	S	2020	2994	4019	No	NA
H	T	1339	2048	2808	No	NA
H	W	1170	2198	3265	No	NA
H	BD	1047	1707	2585	No	NA
H	NOS	1990	2807	3612	No	NA
M	N	0	784	1888	Yes	10
M	R	0	1040	2215	Yes	0
M	S	1084	2200	3283	No	NA
M	T	1372	2151	3040	No	NA
M	W	177	1275	2474	No	NA
M	BD	1454	2180	2911	No	NA
M	NOS	987	1886	2816	No	NA
N	R	794	1819	288	No	NA
N	S	632	1703	2764	No	NA
N	T	519	1511	2490	No	NA
N	W	0	1150	2308	Yes	2
N	BD	1074	1785	2517	No	NA
N	NOS	801	1707	2677	No	NA
R	S	2346	3181	4196	No	NA
R	T	2178	3015	3901	No	NA
R	W	1297	2119	3246	No	NA
R	BD	2008	2774	3726	No	NA
R	NOS	2026	2695	3584	No	NA
S	T	1479	2517	3529	No	NA
S	W	0	1115	2247	Yes	3
S	BD	2582	3207	3822	No	NA
S	NOS	0	839	1768	Yes	3
T	W	1449	2532	3665	No	NA
T	BD	190	867	1690	No	NA
T	NOS	1973	2940	3887	No	NA
W	BD	2197	2976	3720	No	NA
W	NOS	0	591	1516	Yes	4
BD	NOS	2865	3452	4009	No	NA

## Sheet: Demography
group	id	sex
A	AF	F
A	AM1	M
A	AM2	M
B	AM1	M
B	AF	F
B	AM2	M
B	JF	F
B	I	NA
C	AM1	M
C	AF	F
C	J	NA
E	AM1	M
E	AF	F
E	J	NA
H	AM1	M
H	AF	F
H	SAF	F
H	J	NA
M	AM1	M
M	AF	F
M	SAF	F
M	JF	NA
M	I	NA
N	AM1	M
N	AF	F
N	AM2	M
N	SAM	M
N	SAF	F
N	J	NA
R	AM1	M
R	AF	F
R	SAF	F
R	I	NA
S	AM1	M
S	AF	F
S	SAM	M
T	AM1	M
T	AF	F
T	AM2	M
T	SAM	M
T	J	NA
W	AM2	M
W	AF	F
W	AM1	M
W	J	F
BD	AM1	M
BD	AF	F
BD	I	NA
NOS	AM1	M
NOS	AF	F
NOS	AM2	M
NOS	SA	NA
NOS	I	NA
