# Supplementary material for: White-handed gibbons discriminate context-specific song compositions
Source: PeerJ. 2020 Aug 3;8:e9477. doi: 10.7717/peerj.9477 (PMC7409784; doi:10.7717/peerj.9477)
Supplement: Supplemental Information 9 — We found consistent differences at all levels of song organisation, i.e. at the note, figure, phrase and sequence level, especially during the early part of song, that could potentially allow signallers to reliably convey external events, allowing listeners to make inference about them. [file peerj-08-9477-s009.xlsx]

## Sheet: Duration and latency
Group	Context	Song duration	Latency to firstgreat call
A	Duet	333.539	121.852
B	Duet	462.786	122.928
C	Duet	352.999	47.403
E	Duet	532.649	101.44
H	Duet	535.501	136.177
M	Duet	869.719	50.139
N	Duet	714.449	93.354
R	Duet	527.515	116.733
S	Duet	562.52	34.113
T	Duet	759.273	157.882
W	Duet	1115.2	203.144
A	Leopard	2657.53	529.179
B	Leopard	2276.1	869.742
C	Leopard	3932.02	338.405
E	Leopard	3020.83	1078.86
H	Leopard	1930.5	1108.77
M	Leopard	1589.13	514.272
N	Leopard	2382.34	1172.99
R	Leopard	3619.18	369.661
S	Leopard	3935.13	1147.87
T	Leopard	3108.01	NA
W	Leopard	2123.86	2108.03
A	Python	1127.2	195.956
B	Python	1391.52	1177.91
E	Python	991.252	438.469
M	Python	2033.91	464.844
R	Python	1181.23	437.248
S	Python	1210.3	370.093
T	Python	3406.7	2611.55

## Sheet: Hoo-oo figures
Group	Context	Inhalation event duration
M	Reticulated python	0.56
M	Reticulated python	0.506
M	Reticulated python	0.497
M	Reticulated python	0.483
M	Reticulated python	0.219
M	Reticulated python	0.654
M	Reticulated python	0.475
M	Reticulated python	0.416
M	Reticulated python	0.569
M	Reticulated python	0.43
M	Reticulated python	0.497
M	Reticulated python	0.479
M	Reticulated python	0.501
M	Reticulated python	0.385
M	Reticulated python	0.349
M	Reticulated python	0.443
M	Reticulated python	0.215
A	Reticulated python	0.499
A	Reticulated python	0.144
A	Reticulated python	0.535
A	Reticulated python	0.547
A	Reticulated python	0.421
A	Reticulated python	0.463
A	Reticulated python	0.541
A	Reticulated python	0.493
A	Reticulated python	0.463
A	Reticulated python	0.445
A	Reticulated python	0.342
A	Reticulated python	0.427
A	Reticulated python	0.613
A	Reticulated python	0.505
A	Reticulated python	0.403
B	Reticulated python	0.951
B	Reticulated python	0.868
B	Reticulated python	0.261
B	Reticulated python	0.272
B	Reticulated python	0.246
B	Reticulated python	0.187
B	Reticulated python	0.246
B	Reticulated python	0.38
B	Reticulated python	0.353
B	Reticulated python	0.241
B	Reticulated python	0.398
B	Reticulated python	0.241
B	Reticulated python	0.25
B	Reticulated python	0.398
B	Reticulated python	0.38
B	Reticulated python	0.147
B	Reticulated python	0.348
B	Reticulated python	0.187
B	Reticulated python	0.414
B	Reticulated python	0.331
B	Reticulated python	0.366
B	Reticulated python	0.353
B	Reticulated python	0.317
B	Reticulated python	0.165
E	Reticulated python	0.419
E	Reticulated python	0.399
E	Reticulated python	0.498
E	Reticulated python	0.343
E	Reticulated python	0.381
E	Reticulated python	0.428
E	Reticulated python	0.479
E	Reticulated python	0.578
E	Reticulated python	0.508
E	Reticulated python	0.592
E	Reticulated python	0.653
E	Reticulated python	0.376
E	Reticulated python	0.333
E	Reticulated python	0.23
E	Reticulated python	0.343
E	Reticulated python	0.348
E	Reticulated python	0.338
E	Reticulated python	0.329
E	Reticulated python	0.38
E	Reticulated python	0.432
E	Reticulated python	0.357
E	Reticulated python	0.404
E	Reticulated python	0.498
R	Reticulated python	0.365
R	Reticulated python	0.384
R	Reticulated python	0.31
R	Reticulated python	0.411
R	Reticulated python	0.416
R	Reticulated python	0.128
R	Reticulated python	0.393
R	Reticulated python	0.416
R	Reticulated python	0.329
R	Reticulated python	0.26
R	Reticulated python	0.324
R	Reticulated python	0.443
R	Reticulated python	0.406
R	Reticulated python	0.32
R	Reticulated python	0.329
R	Reticulated python	0.288
R	Reticulated python	0.361
R	Reticulated python	0.1
S	Reticulated python	0.342
S	Reticulated python	0.268
S	Reticulated python	0.405
S	Reticulated python	0.279
S	Reticulated python	0.325
S	Reticulated python	0.61
E	Clouded leopard	0.091
E	Clouded leopard	0.064
E	Clouded leopard	0.156
E	Clouded leopard	0.264
E	Clouded leopard	0.21
E	Clouded leopard	0.221
E	Clouded leopard	0.264
E	Clouded leopard	0.183
E	Clouded leopard	0.313
E	Clouded leopard	0.232
E	Clouded leopard	0.21
H	Clouded leopard	0.087
H	Clouded leopard	0.068
H	Clouded leopard	0.074
H	Clouded leopard	0.105
M	Clouded leopard	0.206
M	Clouded leopard	0.383
M	Clouded leopard	0.37
M	Clouded leopard	0.401
M	Clouded leopard	0.395
M	Clouded leopard	0.48
M	Clouded leopard	0.34
M	Clouded leopard	0.413
M	Clouded leopard	0.395
M	Clouded leopard	0.158
M	Clouded leopard	0.258
R	Clouded leopard	0.175
S	Clouded leopard	0.115
S	Clouded leopard	0.145
S	Clouded leopard	0.306
S	Clouded leopard	0.216
S	Clouded leopard	0.206
S	Clouded leopard	0.095
S	Clouded leopard	0.211
S	Clouded leopard	0.135
S	Clouded leopard	0.211
S	Clouded leopard	0.115
S	Clouded leopard	0.186
S	Clouded leopard	0.175
S	Clouded leopard	0.09
S	Clouded leopard	0.165
S	Clouded leopard	0.13
S	Clouded leopard	0.125
S	Clouded leopard	0.095
W	Clouded leopard	0.514
W	Clouded leopard	0.448
W	Clouded leopard	0.359
W	Clouded leopard	0.542
W	Clouded leopard	0.254
W	Clouded leopard	0.431
W	Clouded leopard	0.508
W	Clouded leopard	0.188
W	Clouded leopard	0.32
W	Clouded leopard	0.116
W	Clouded leopard	0.191
W	Clouded leopard	0.121
W	Clouded leopard	0.177
W	Clouded leopard	0.154
W	Clouded leopard	0.182
W	Clouded leopard	0.237
A	Clouded leopard	0.072
A	Clouded leopard	0.079
A	Clouded leopard	0.139
A	Clouded leopard	0.252

## Sheet: Sharp wow
Group_ID	Context	Latency to first	Number
A	Duet	57.98	2
B	Duet	86.127	13
C	Duet	87.073	4
E	Duet	201.507	5
H	Duet	32.592	7
M	Duet	85.554	22
N	Duet	34.673	8
R	Duet	92.339	7
S	Duet	141.735	1
T	Duet	NA	0
W	Duet	145.715	4
A	Clouded leopard	346.324	108
B	Clouded leopard	234.134	254
C	Clouded leopard	232.938	1094
E	Clouded leopard	306.29	116
H	Clouded leopard	181.075	681
M	Clouded leopard	328.438	188
N	Clouded leopard	426.785	357
R	Clouded leopard	291.723	537
T	Clouded leopard	186.738	623
S	Clouded leopard	316.822	634
W	Clouded leopard	670.993	87
A	Reticulated python	334.075	1
B	Reticulated python	486.796	211
E	Reticulated python	266.771	39
M	Reticulated python	369.587	217
R	Reticulated python	219.147	116
S	Reticulated python	550.738	5
T	Reticulated python	1464.13	298

## Sheet: Great call
Date	Group_ID	Context	Context2	Song_type	Song_type2	Song_duration	Gc_rank	Latency_GC	GC_int	N_notes	Gc_dur	Plus	Interval	Male coda	Coda_dur	Coda_type
20140501	A	Duet	Duet	Duet	Duet	333.539	4	309.117	#REF!	11	19.891	Normal	2.173	Present	2.689	Simple
20130527	B	Duet	Duet	Duet	Duet	462.786	1	122.928	NA	7	14.556	Normal	0.546	Present	4.235	Quaver
20130527	B	Duet	Duet	Duet	Duet	462.786	2	191.837	68.909	3	6.212	Abnormal	1.246	Present	0.998	Simple
20130527	B	Duet	Duet	Duet	Duet	462.786	3	230.043	38.206	8	17.176	Normal	0.794	Present	4.241	Quaver
20130527	B	Duet	Duet	Duet	Duet	462.786	4	293.394	63.351	3	6.715	Abnormal	0.667	Present	3.828	Quaver
20130527	B	Duet	Duet	Duet	Duet	462.786	5	320.783	27.389	5	10.346	Abnormal	0.559	Present	3.446	Quaver
20130527	B	Duet	Duet	Duet	Duet	462.786	6	372.872	52.089	6	14.276	Normal	3.764	Present	3.503	Quaver
20131130	C	Duet	Duet	Duet	Duet	352.999	1	47.403	NA	9	17.956	Normal	0.136	Present	3.546	Simple
20131130	C	Duet	Duet	Duet	Duet	352.999	2	106.071	58.668	8	17.893	Normal	0.284	Present	2.573	Quaver
20131130	C	Duet	Duet	Duet	Duet	352.999	3	177.681	71.61	8	17.859	Normal	0.771	Present	3.398	Quaver
20131130	C	Duet	Duet	Duet	Duet	352.999	4	304.219	126.538	8	17.557	Normal	0.358	Present	3.387	Quaver
20130316	E	Duet	Duet	Duet	Duet	532.649	1	101.44	NA	7	18.081	Normal	0.244	Present	3.727	Simple
20130316	E	Duet	Duet	Duet	Duet	532.649	2	264.935	163.495	8	18.695	Normal	0.188	Present	1.98	Simple
20130316	E	Duet	Duet	Duet	Duet	532.649	3	337.255	72.32	7	17.737	Normal	0.476	Present	2.811	Quaver
20130316	E	Duet	Duet	Duet	Duet	532.649	5	510.582	#REF!	8	18.312	Normal	0.566	Present	3.219	Quaver
20140321	M	Duet	Duet	Duet	Duet	869.719	1	50.139	NA	11	20.156	Normal	1.07	Present	2.198	Simple
20140321	M	Duet	Duet	Duet	Duet	869.719	2	137.088	86.949	9	17.935	Normal	-1.04	Present	4.72	Simple
20140321	M	Duet	Duet	Duet	Duet	869.719	3	271.088	134	9	17.268	Normal	1.15	Present	4.141	Quaver
20140321	M	Duet	Duet	Duet	Duet	869.719	4	413.365	142.277	9	18.133	Normal	0.857	Present	4.705	Quaver
20140321	M	Duet	Duet	Duet	Duet	869.719	5	564.816	151.451	8	16.549	Normal	1.121	Present	3.298	Quaver
20140321	M	Duet	Duet	Duet	Duet	869.719	6	735.092	170.276	9	17.356	Normal	1.289	Present	3.254	Quaver
20130712	N	Duet	Duet	Duet	Duet	714.449	1	93.354	NA	7	18.644	Normal	0.868	Present	1.151	Simple
20130712	N	Duet	Duet	Duet	Duet	714.449	2	187.099	93.745	9	20.599	Normal	0.5	Present	0.934	Simple
20130712	N	Duet	Duet	Duet	Duet	714.449	3	282.904	95.805	8	19.819	Normal	1.136	Present	2.089	Simple
20130712	N	Duet	Duet	Duet	Duet	714.449	4	428.739	145.835	8	20.233	Normal	0.404	Present	1.723	Simple
20130712	N	Duet	Duet	Duet	Duet	714.449	5	573.92	145.181	7	18.577	Normal	0.77	Present	2.956	Simple
20140416	T	Duet	Duet	Duet	Duet	759.273	1	157.882	NA	9	18.351	Normal	-0.096	Present	2.533	Simple
20140416	T	Duet	Duet	Duet	Duet	759.273	2	327.849	169.967	10	18.266	Normal	-0.769	Present	2.654	Simple
20140416	T	Duet	Duet	Duet	Duet	759.273	3	449.653	121.804	10	18.526	Normal	-0.484	Present	3.127	Simple
20140416	T	Duet	Duet	Duet	Duet	759.273	4	583.276	133.623	9	17.636	Normal	-0.23	Present	2.848	Simple
20140821	H	Duet	Duet	Duet	Duet	535.501	1	136.177	NA	10	22.508	Normal	-0.612	Present	2.345	Quaver
20140821	H	Duet	Duet	Duet	Duet	535.501	2	248.13	111.953	11	21.996	Normal	-1.001	Present	3.623	Quaver
20140821	H	Duet	Duet	Duet	Duet	535.501	3	461.423	213.293	10	21.385	Normal	-0.716	Present	3.029	Quaver
20140407	R	Duet	Duet	Duet	Duet	527.515	1	116.733	NA	11	22.36	Normal	0.036	Present	3.273	Quaver
20140407	R	Duet	Duet	Duet	Duet	527.515	2	225.938	109.205	10	20.32	Normal	0.157	Present	3.794	Quaver
20130523	R	Duet	Duet	Duet	Duet	527.515	3	336.197	110.259	10	21.252	Normal	0.357	Present	2.971	Quaver
20140522	W	Duet	Duet	Duet	Duet	1115.2	1	203.144	NA	9	17.195	Normal	1.952	Present	0.336	Simple
20140522	W	Duet	Duet	Duet	Duet	1115.2	2	261.538	58.394	8	16.223	Normal	1.765	Present	2.393	Simple
20140522	W	Duet	Duet	Duet	Duet	1115.2	3	381.571	120.033	8	16.245	Normal	1.653	Present	2.789	Quaver
20140522	W	Duet	Duet	Duet	Duet	1115.2	4	507.507	125.936	8	16.103	Normal	2.61	Present	2.875	Quaver
20140522	W	Duet	Duet	Duet	Duet	1115.2	5	626.448	118.941	8	16.088	Normal	1.57	Present	3.193	Quaver
20140522	W	Duet	Duet	Duet	Duet	1115.2	6	827.083	200.635	9	16.986	Normal	1.907	Present	3.388	Quaver
20140522	W	Duet	Duet	Duet	Duet	1115.2	7	923.369	96.286	9	16.926	Normal	1.54	Present	3.358	Quaver
20140429	S	Duet	Duet	Duet	Duet	562.52	1	34.113	NA	7	17.097	Normal	1.19	Present	1.076	Simple
20140429	S	Duet	Duet	Duet	Duet	562.52	2	217.618	183.505	8	17.758	Normal	1.178	Present	2.694	Quaver
20140429	S	Duet	Duet	Duet	Duet	562.52	3	353.718	136.1	8	17.043	Normal	0.956	Present	2.886	Quaver
20130325	A	Leopard	Clouded leopard	Predator song	Loud song	2657.72	1	529.179	NA	9	15.496	Normal	-3.683	NC	NA	SF
20130326	A	Leopard	Clouded leopard	Predator song	Loud song	2657.72	2	1134.93	605.754	9	15.86	Normal	-2.686	NC	NA	SF
20120229	B	Leopard	Clouded leopard	Predator song	Loud song	2276.1	1	869.742	NA	8	17.316	Normal	-2.258	NC	NA	SF
20120229	B	Leopard	Clouded leopard	Predator song	Loud song	2276.1	2	1192.95	323.207	7	18.411	Normal	-1.838	NC	NA	SF
20120229	B	Leopard	Clouded leopard	Predator song	Loud song	2276.1	3	1287.56	94.611	6	15.137	Normal	-0.209	NC	NA	SF
20120229	B	Leopard	Clouded leopard	Predator song	Loud song	2276.1	5	1778.92	#REF!	8	16.158	Normal	-2.241	NC	NA	SF
20120229	B	Leopard	Clouded leopard	Predator song	Loud song	2276.1	6	2238.62	459.708	8	16.073	Normal	-0.26	NC	NA	SF
20120201	C	Leopard	Clouded leopard	Predator song	Loud song	3932.02	1	338.405	NA	9	17.416	Normal	-1.399	NC	NA	SF
20120201	C	Leopard	Clouded leopard	Predator song	Loud song	3932.02	2	642.278	303.873	8	15.319	Normal	-4.323	NC	NA	SF
20120201	C	Leopard	Clouded leopard	Predator song	Loud song	3932.02	3	755.483	113.205	10	17.893	Normal	-3.118	NC	NA	SF
20120201	C	Leopard	Clouded leopard	Predator song	Loud song	3932.02	4	863.037	107.554	8	17.673	Normal	-2.054	NC	NA	SF
20120201	C	Leopard	Clouded leopard	Predator song	Loud song	3932.02	5	1157.06	294.026	9	18.244	Normal	-4.47	NC	NA	SF
20120201	C	Leopard	Clouded leopard	Predator song	Loud song	3932.02	6	1268.13	111.071	9	17.233	Normal	-0.843	NC	NA	SF
20120201	C	Leopard	Clouded leopard	Predator song	Loud song	3932.02	7	1445.02	176.888	10	18.548	Normal	0.209	NC	NA	SF
20120201	C	Leopard	Clouded leopard	Predator song	Loud song	3932.02	8	1594.76	149.737	9	17.783	Normal	0.309	NC	NA	SF
20120201	C	Leopard	Clouded leopard	Predator song	Loud song	3932.02	9	1956.47	361.71	9	17.552	Normal	0.356	NC	NA	SF
20120201	C	Leopard	Clouded leopard	Predator song	Loud song	3932.02	10	2299.07	342.596	9	17.112	Normal	-1.268	NC	NA	SF
20120706	E	Leopard	Clouded leopard	Predator song	Loud song	3020.83	2	1336.4	#REF!	4	8.205	Abnormal	-0.093	NC	NA	SF
20120706	E	Leopard	Clouded leopard	Predator song	Loud song	3020.83	3	1366.75	30.35	4	8.924	Abnormal	0.258	NC	NA	SF
20120706	E	Leopard	Clouded leopard	Predator song	Loud song	3020.83	4	1470.32	103.565	5	9.922	Abnormal	-0.538	NC	NA	SF
20120706	E	Leopard	Clouded leopard	Predator song	Loud song	3020.83	5	1809.03	338.715	5	8.759	Abnormal	0.129	NC	NA	SF
20120706	E	Leopard	Clouded leopard	Predator song	Loud song	3020.83	6	1981.01	171.972	8	17.439	Normal	-2.031	NC	NA	SF
20120217	H	Leopard	Clouded leopard	Predator song	Loud song	1930.5	1	1108.77	NA	10	20.829	Normal	-4.599	NC	NA	SF
20120217	H	Leopard	Clouded leopard	Predator song	Loud song	1930.5	2	1840.23	731.461	10	21.371	Normal	0.062	Present	2.842	Quaver
20120607	M	Leopard	Clouded leopard	Predator song	Loud song	1589.13	1	514.272	NA	10	17.5	Normal	-4.086	NC	NA	SF
20120607	M	Leopard	Clouded leopard	Predator song	Loud song	1589.13	2	770.107	255.835	10	17.178	Normal	-3.721	NC	NA	SF
20120607	M	Leopard	Clouded leopard	Predator song	Loud song	1589.13	3	1045.41	275.305	11	18.825	Normal	-3.155	NC	NA	SF
20120607	M	Leopard	Clouded leopard	Predator song	Loud song	1589.13	4	1187.49	142.082	10	17.938	Normal	-0.237	NC	NA	SF
20120119	N	Leopard	Clouded leopard	Predator song	Loud song	2382.34	1	1172.99	NA	8	20.483	Normal	-3.199	NC	NA	SF
20120119	N	Leopard	Clouded leopard	Predator song	Loud song	2382.34	2	1966.39	793.397	8	20.667	Normal	-3.054	NC	NA	SF
20120119	R	Leopard	Clouded leopard	Predator song	Loud song	3619.18	5	1396.32	#REF!	9	18.611	Normal	-3.165	NC	NA	SF
20120119	R	Leopard	Clouded leopard	Predator song	Loud song	3619.18	7	1772.52	#REF!	9	18.918	Normal	-3.259	NC	NA	SF
20120119	R	Leopard	Clouded leopard	Predator song	Loud song	3619.18	9	3057.48	#REF!	9	19.207	Normal	-2.996	NC	NA	SF
20120215	S	Leopard	Clouded leopard	Predator song	Loud song	3935.13	1	1147.87	NA	11	20.456	Normal	-1.357	NC	NA	SF
20120215	S	Leopard	Clouded leopard	Predator song	Loud song	3935.13	2	2067.45	919.586	11	21.399	Normal	-0.22	NC	NA	SF
20120215	S	Leopard	Clouded leopard	Predator song	Loud song	3935.13	4	2456.71	#REF!	10	18.905	Normal	-1.491	NC	NA	SF
20120215	S	Leopard	Clouded leopard	Predator song	Loud song	3935.13	5	3290.41	833.692	10	20.403	Normal	-0.267	NC	NA	SF
20120215	S	Leopard	Clouded leopard	Predator song	Loud song	3935.13	6	3573.78	283.375	11	21.4	Normal	0.11	Present	1.017	Simple
20140428	A	Python	Reticulated python	Predator song	Loud song	1127.2	2	349.157	#REF!	9	16.615	Normal	-2.358	NC	NA	SF
20140523	B	Python	Reticulated python	Predator song	Loud song	1391.25	1	1177.91	NA	7	16.863	Normal	-1.204	NC	NA	SF
20140523	B	Python	Reticulated python	Predator song	Loud song	1391.25	2	1391.25	213.343	8	15.587	Normal	-2.666	NC	NA	SF
20130414	E	Python	Reticulated python	Predator song	Loud song	991.252	1	438.469	NA	7	16.516	Normal	0.143	Present	1.657	Simple
20130414	E	Python	Reticulated python	Predator song	Loud song	991.252	2	763.719	325.25	7	17.623	Normal	0.125	Present	2.296	Quaver
20130415	M	Python	Reticulated python	Predator song	Loud song	2033.92	1	464.844	NA	9	16.336	Normal	-1.627	NC	NA	SF
20130415	M	Python	Reticulated python	Predator song	Loud song	2033.92	2	1117.04	652.195	9	15.936	Normal	-2.068	NC	NA	SF
20130415	M	Python	Reticulated python	Predator song	Loud song	2033.92	3	1385.77	268.731	10	17.152	Normal	-1.609	NC	NA	SF
20130415	M	Python	Reticulated python	Predator song	Loud song	2033.92	4	1591.96	206.189	10	17.265	Normal	1.621	Present	2.652	Simple
20130415	M	Python	Reticulated python	Predator song	Loud song	2033.92	5	1846.17	254.209	10	17.593	Normal	2.3	Present	2.431	Simple
20130327	R	Python	Reticulated python	Predator song	Loud song	1181.23	1	437.248	NA	10	18.564	Normal	0.234	Present	3.47	Quaver
20130327	R	Python	Reticulated python	Predator song	Loud song	1181.23	2	550.291	113.043	10	19.51	Normal	0.364	Present	5.152	Quaver
20130327	R	Python	Reticulated python	Predator song	Loud song	1181.23	3	834.535	284.244	9	18.604	Normal	0.331	Present	4.837	Quaver
20130327	R	Python	Reticulated python	Predator song	Loud song	1181.23	4	1097.34	262.809	11	21.209	Normal	0.728	Present	3.065	Simple
20130423	S	Python	Reticulated python	Predator song	Loud song	1210.3	1	370.093	NA	7	18.909	Normal	1.591	Present	0.261	Simple
20130423	S	Python	Reticulated python	Predator song	Loud song	1210.3	2	447.05	76.957	7	17.284	Normal	2.537	Present	1.099	Simple
20130423	S	Python	Reticulated python	Predator song	Loud song	1210.3	3	562.114	115.064	9	20.727	Normal	1.014	Present	0.461	Simple
20130423	S	Python	Reticulated python	Predator song	Loud song	1210.3	4	794.36	232.246	4	10.03	Abnormal	0.08	Present	3.17	Quaver
20130423	S	Python	Reticulated python	Predator song	Loud song	1210.3	5	902.309	107.949	8	18.413	Normal	0.733	Present	1.618	Quaver
20130423	S	Python	Reticulated python	Predator song	Loud song	1210.3	6	1020.34	118.03	7	16.479	Normal	0.699	Present	2.69	Quaver
20130409	T	Python	Reticulated python	Predator song	Loud song	3406.7	1	2611.55	NA	10	17.635	Normal	-0.721	Present	3.241	Quaver
20130409	T	Python	Reticulated python	Predator song	Loud song	3406.7	2	2920.4	308.85	11	19.1	Normal	-1.362	Present	3.197	Quaver

## Sheet: Songs
Group_ID	Context	Song_duration	N_Gc	Hoo_N	Hoo_dur	Hoo_rate	OO_dur	Hoo_OO_dur	N_short	N_long	Inhalation	Coda_resp
A	Duet	333.539	4	14	6.965	2.01005	5.836	12.801	0	0	0	0.25
B	Duet	462.786	6	28	14.86	1.88425	5.728	20.588	0	0	0	1
C	Duet	352.999	4	9	20.064	0.448565	2.18	22.244	0	0	0	1
E	Duet	532.649	5	35	32.606	1.07342	3.708	36.314	0	0	0	0.8
H	Duet	535.501	3	8	10.733	0.745365	3.269	14.002	0	0	0	1
M	Duet	869.719	6	5	3.526	1.41804	0.29	3.816	0	0	0	1
N	Duet	714.449	5	24	9.755	2.46028	1.026	10.781	0	0	0	1
R	Duet	527.515	3	16	11.026	1.45112	2.341	13.367	0	0	0	1
S	Duet	562.52	3	9	5.186	1.73544	1.813	6.999	0	0	0	1
T	Duet	759.273	4	4	3.502	1.1422	11.13	14.632	0	0	0	1
W	Duet	1115.2	7	7	8.047	0.869889	1.77	9.817	0	0	0	1
A	Clouded leopard	2657.53	2	78	27.722	2.81365	113.39	141.112	4	0	4	0
B	Clouded leopard	2276.1	6	54	24.574	2.19744	41.656	66.23	0	0	0	0
C	Clouded leopard	3932.02	11	15	7.521	1.99442	31.452	38.973	3	16	19	0
E	Clouded leopard	3020.83	6	199	76.822	2.5904	38.773	115.595	4	7	11	0
H	Clouded leopard	1930.5	2	74	34.254	2.16033	12.698	46.952	9	0	9	0.5
M	Clouded leopard	1589.13	4	56	30.555	1.83276	126.668	157.223	1	10	11	0
N	Clouded leopard	2382.34	2	19	6.519	2.91456	21.89	28.409	0	0	0	0
R	Clouded leopard	3619.18	9	41	20.568	1.99339	23.08	43.648	4	0	4	0
T	Clouded leopard	3108.01	0	51	28.533	1.7874	65.577	94.11	0	0	0	NA
S	Clouded leopard	3935.13	6	33	16.774	1.96733	55.104	71.878	13	5	18	0.166667
W	Clouded leopard	2123.86	1	9	4.59	1.96078	128.921	133.511	7	9	16	0
A	Reticulated python	1127.2	2	17	8.757	1.9413	172.303	181.06	1	20	21	0
B	Reticulated python	1391.52	2	88	40.181	2.19009	329.746	369.927	3	18	21	0
E	Reticulated python	991.252	2	40	19.853	2.01481	203.496	223.349	0	23	23	1
M	Reticulated python	2033.91	5	16	9.589	1.66858	204.335	213.924	0	17	17	0.4
R	Reticulated python	1181.23	4	10	4.335	2.30681	155.295	159.63	1	17	18	1
S	Reticulated python	1210.3	5	19	10.2	1.86275	360.593	370.793	0	7	7	1
T	Reticulated python	3406.7	2	20	12.151	1.64596	125.357	137.508	0	0	3	1

## Sheet: Hoo analysis
Group_ID	Context	Sex	Duration	Intercall	Peak	Low	Delta_freq
A	Duet	Female	0.083	0.885	457.9	396.3	61.6
A	Duet	Female	0.067	2.13	467.3	386.9	80.4
A	Duet	Male	0.105	0.828	605.6	543.9	61.7
A	Duet	Female	0.081	0.805	491.6	443	48.6
A	Duet	Male	0.107	0.704	639.3	547.7	91.6
A	Duet	Female	0.113	0.447	515.9	456.1	59.8
A	Duet	Male	0.092	0.565	607.5	530.8	76.7
A	Duet	Female	0.105	0.41	491.6	405.6	86
A	Duet	Male	0.1	0.506	605.6	523.4	82.2
A	Duet	Male	0.103	1.341	592.5	515.9	76.6
B	Duet	Female	0.085	0.582	384.9	334.5	50.4
B	Duet	Female	0.074	0.724	397	344.6	52.4
B	Duet	Female	0.086	0.413	405	362.7	42.3
B	Duet	Male	0.089	0.462	507.8	441.3	66.5
B	Duet	Male	0.089	0.97	517.9	449.4	68.5
C	Duet	Male	0.148	3.607	595.5	479.4	116.1
C	Duet	Male	0.129	1.957	610.5	494.4	116.1
C	Duet	Male	0.157	0.587	584.3	464.4	119.9
C	Duet	Female	0.092	0.522	543.1	419.5	123.6
C	Duet	Male	0.102	NA	625.5	490.6	134.8
C	Duet	Female	0.12	NA	558.1	419.5	138.6
E	Duet	Male	0.1	0.591	576.3	476.9	99.4
E	Duet	Male	0.081	0.447	571	498.4	72.6
E	Duet	Male	0.089	0.58	581.7	495.7	86
E	Duet	Male	0.078	0.853	581.7	511.8	69.9
E	Duet	Male	0.092	0.772	584.4	514.5	69.9
E	Duet	Female	0.07	0.931	517.2	460.8	56.4
E	Duet	Female	0.078	NA	552.2	479.6	72.6
H	Duet	Female	0.062	0.733	541.7	488.5	53.2
H	Duet	Female	0.071	1.576	533.3	474.5	58.8
H	Duet	Female	0.049	1.964	538.9	474.5	64.4
H	Duet	Male	0.092	1.493	564.1	494.1	70
H	Duet	Female	0.068	1.148	527.7	466.1	61.6
H	Duet	Male	0.108	1.502	606.2	527.7	78.5
H	Duet	Male	0.135	NA	586.8	513.7	73.1
M	Duet	Male	0.1	1.884	612.9	497.7	115.2
M	Duet	Female	0.067	1.648	442.4	391.7	50.7
M	Duet	Male	0.078	0.927	617.5	539.2	78.3
M	Duet	Female	0.078	0.613	502.3	442.4	59.9
M	Duet	Male	0.067	NA	603.7	506.9	96.8
M	Duet	Female	0.096	NA	506.9	405.5	101.4
N	Duet	Male	0.103	1.245	539.8	494.5	45.3
N	Duet	Female	0.063	0.51	481.6	437.5	44.1
N	Duet	Female	0.055	0.761	422.8	357.4	65.4
N	Duet	Male	0.129	1.821	569.9	496.3	73.6
N	Duet	Female	0.059	0.539	485.3	404.4	80.9
N	Duet	Female	0.059	1.153	474.3	404.4	69.9
N	Duet	Male	0.118	1.33	610.3	500	110.3
N	Duet	Female	0.074	0.514	459.6	393.4	66.2
N	Duet	Male	0.067	NA	588.2	507.4	80.8
R	Duet	Male	0.129	0.632	611.8	511.8	100
R	Duet	Male	0.137	0.61	603.9	500	103.9
R	Duet	Male	0.129	2.324	611.8	511.8	100
R	Duet	Male	0.129	0.724	600	488.2	111.8
R	Duet	Male	0.111	0.717	636.4	526	110.4
R	Duet	Female	0.103	0.709	539	422.1	116.9
R	Duet	Female	0.1	0.458	575.5	458.8	116.7
R	Duet	Female	0.1	0.61	547.1	458.8	88.3
R	Duet	Female	0.118	0.628	594.1	470.6	123.5
S	Duet	Female	0.074	1.352	484.7	404.6	80.1
S	Duet	Female	0.107	NA	488.5	404.6	83.9
S	Duet	Female	0.122	2.501	473.3	408.4	64.9
S	Duet	Female	0.081	NA	461.8	374	87.8
S	Duet	Male	0.096	0.51	568.7	461.8	106.9
S	Duet	Male	0.085	0.665	576.3	477.1	99.2
S	Duet	Male	0.111	0.44	599.2	496.2	103
S	Duet	Male	0.103	0.421	618.3	480.9	137.4
S	Duet	Male	0.107	0.229	626	473.3	152.7
T	Duet	Female	0.052	2.435	543.5	418.5	125
T	Duet	Female	0.074	0.496	554.3	483.3	71
T	Duet	Female	0.068	0.366	558.6	448.3	110.3
T	Duet	Female	0.095	0.246	532.6	429.3	103.3
W	Duet	Female	0.07	NA	531.7	462.2	69.5
W	Duet	Female	0.055	2.302	556.2	490.8	65.4
W	Duet	Male	0.081	0.203	617.6	548.1	69.5
W	Duet	Male	0.074	0.159	601.2	539.9	61.3
W	Duet	Male	0.115	0.163	609.4	544	65.4
W	Duet	Male	0.126	NA	654.4	556.2	98.2
A	Leopard	Male	0.07	0.331	555.8	457.9	97.9
A	Leopard	Male	0.076	0.379	559.7	465.8	93.9
A	Leopard	Male	0.07	0.373	536.2	454	82.2
A	Leopard	Male	0.074	0.406	544	469.7	74.3
A	Leopard	Male	0.07	0.323	544	465.8	78.2
A	Leopard	Female	0.113	3.353	356.6	242.9	113.7
A	Leopard	Female	0.126	2.095	361.8	263.6	98.2
A	Leopard	Female	0.126	2.839	397.9	304.9	93
A	Leopard	Female	0.15	2.714	372.1	263.6	108.5
A	Leopard	Female	0.126	3.046	444.4	273.9	170.5
B	Leopard	Female	0.111	0.502	400.2	340.3	59.9
B	Leopard	Female	0.126	0.17	403.4	346.6	56.8
B	Leopard	Female	0.081	0.244	431.7	359.2	72.5
B	Leopard	Female	0.081	0.539	464.2	363.7	100.5
B	Leopard	Female	0.096	0.539	456.5	363.8	92.7
B	Leopard	Male	0.048	0.34	489.4	419.5	69.9
B	Leopard	Male	0.055	0.639	514.8	400.4	114.4
B	Leopard	Male	0.092	0.55	543.8	400.4	143.4
B	Leopard	Male	0.103	0.491	492.6	403.6	89
B	Leopard	Male	0.111	0.495	495.8	406.8	89
C	Leopard	Female	0.044	0.369	463.7	377.7	86
C	Leopard	Female	0.049	0.475	471.8	399.2	72.6
C	Leopard	Female	0.049	0.453	463.7	387.1	76.6
C	Leopard	Female	0.062	0.448	487.9	407.9	80
C	Leopard	Female	0.081	0.512	483.9	403.2	80.7
C	Leopard	Male	0.057	0.539	516.1	423.4	92.7
C	Leopard	Male	0.057	0.988	532.3	427.4	104.9
C	Leopard	Male	0.059	0.424	552.4	439.5	112.9
C	Leopard	Male	0.057	0.599	536.3	455.6	80.7
C	Leopard	Male	0.052	0.468	544.4	451.6	92.8
E	Leopard	Female	0.078	0.593	546.8	344.3	202.5
E	Leopard	Male	0.092	0.82	551.9	465.8	86.1
E	Leopard	Female	0.078	1.382	475.9	384.8	91.1
E	Leopard	Male	0.074	0.768	551.9	425.3	126.6
E	Leopard	Male	0.067	1.028	582.3	475.9	106.4
E	Leopard	Female	0.089	1.788	491.1	405.1	86
E	Leopard	Male	0.074	2.383	582.3	475.9	106.4
E	Leopard	Female	0.078	2.669	481	389.9	91.1
E	Leopard	Male	0.072	0.632	582.3	440.5	141.8
E	Leopard	Female	0.067	1.101	470.9	389.9	81
H	Leopard	Male	0.079	0.431	529.1	385.7	143.4
H	Leopard	Male	0.079	0.463	534.8	379.7	155.1
H	Leopard	Male	0.079	0.517	524.1	374.3	149.8
H	Leopard	Male	0.101	0.574	492	374.3	117.7
H	Leopard	Male	0.064	0.32	529.4	369	160.4
H	Leopard	Female	0.101	0.554	462.2	360	102.2
H	Leopard	Female	0.094	0.707	462.2	360	102.2
H	Leopard	Female	0.074	0.5	462.2	373.3	88.9
H	Leopard	Female	0.081	0.197	480	386.7	93.3
H	Leopard	Female	0.062	0.495	475.6	377.8	97.8
M	Leopard	Male	0.089	0.385	570.6	420.4	150.2
M	Leopard	Male	0.105	0.751	558.6	438.4	120.2
M	Leopard	Male	0.086	0.311	540.5	426.4	114.1
M	Leopard	Male	0.117	0.443	606.6	426.4	180.2
M	Leopard	Male	0.099	0.4	618.6	462.5	156.1
M	Leopard	Female	0.034	0.403	473.6	340.2	133.4
M	Leopard	Female	0.043	0.357	473.6	358.6	115
M	Leopard	Female	0.034	0.339	496.6	367.8	128.8
M	Leopard	Female	0.08	0.357	452.2	354	98.2
M	Leopard	Female	0.071	0.311	436.8	363	73.8
N	Leopard	Male	0.126	0.613	482.5	383.5	99
N	Leopard	Male	0.108	0.185	494.8	395.9	98.9
N	Leopard	Female	0.065	0.81	379.4	325.8	53.6
N	Leopard	Male	0.132	0.69	503.1	400	103.1
N	Leopard	Female	0.117	0.653	449.5	354.6	94.9
N	Leopard	Male	0.117	0.142	499	395.9	103.1
N	Leopard	Male	0.166	0.179	532	408.2	123.8
N	Leopard	Female	0.092	NA	445.4	371.1	74.3
R	Leopard	Female	0.074	0.437	430.8	350	80.8
R	Leopard	Female	0.068	0.511	423.1	338.5	84.6
R	Leopard	Female	0.08	0.376	446.2	353.8	92.4
R	Leopard	Female	0.068	0.397	434.6	346.2	88.4
R	Leopard	Female	0.055	0.369	453.8	353.8	100
S	Leopard	Male	0.132	0.45	585.2	460.2	125
S	Leopard	Male	0.129	0.431	585.2	448.9	136.3
S	Leopard	Male	0.142	0.366	602.3	448.9	153.4
S	Leopard	Male	0.132	0.496	568.2	443.2	125
S	Leopard	Male	0.135	0.474	596.6	448.9	147.7
S	Leopard	Female	0.074	1.755	479.7	372.6	107.1
S	Leopard	Female	0.089	0.856	471.1	364	107.1
S	Leopard	Female	0.083	0.872	475.4	368.3	107.1
S	Leopard	Female	0.105	NA	479.7	372.6	107.1
T	Leopard	Female	0.049	0.764	430.2	313.2	117
T	Leopard	Female	0.077	0.714	388.7	317	71.7
T	Leopard	Female	0.071	0.77	441.5	324.5	117
T	Leopard	Female	0.089	0.662	396.2	328.3	67.9
T	Leopard	Female	0.083	0.72	434	332.1	101.9
T	Leopard	Male	0.086	0.983	671.9	437.5	234.4
T	Leopard	Male	0.086	0.634	683.6	441.4	242.2
T	Leopard	Male	0.095	0.47	589.8	433.6	156.2
T	Leopard	Male	0.103	0.677	707	441.4	265.6
T	Leopard	Male	0.103	NA	668	418	250
W	Leopard	Female	0.117	0.32	481.1	386.8	94.3
W	Leopard	Female	0.111	0.265	493.7	396.6	97.1
W	Leopard	Female	0.157	0.222	476.8	388.2	88.6
W	Leopard	Female	0.089	0.782	450.3	377	73.3
W	Leopard	Female	0.099	0.179	544.5	450.3	94.2
A	Python	Male	0.074	0.382	585	457	128
A	Python	Male	0.089	0.403	574	460.7	113.3
A	Python	Male	0.092	0.36	563.1	449.7	113.4
A	Python	Male	0.102	0.283	552.1	453.4	98.7
A	Python	Male	0.108	0.269	559.4	449.7	109.7
A	Python	Female	0.111	0.464	446.1	292.5	153.6
A	Python	Female	0.095	1.016	394.9	303.5	91.4
A	Python	Female	0.124	0.816	457	310.8	146.2
A	Python	Female	0.102	1.195	431.4	299.8	131.6
A	Python	Female	0.074	1.099	391.2	307.1	84.1
B	Python	Male	0.068	0.428	519.4	383.7	135.7
B	Python	Male	0.071	0.53	496.1	348.8	147.3
B	Python	Male	0.071	0.474	511.6	352.7	158.9
B	Python	Male	0.068	0.339	476.7	368.2	108.5
B	Python	Male	0.071	0.49	519.4	372.1	147.3
B	Python	Female	0.059	0.265	444.4	382.2	62.2
B	Python	Female	0.105	0.311	403	331.9	71.1
B	Python	Female	0.142	0.212	411.9	331.9	80
B	Python	Female	0.185	0.228	414.8	323	91.8
E	Python	Male	0.059	0.475	569.1	469.2	99.9
E	Python	Male	0.052	0.397	545.8	495.8	50
E	Python	Male	0.069	0.294	545.8	472.5	73.3
E	Python	Male	0.059	0.387	545.8	492.5	53.3
E	Python	Male	0.057	0.288	545.8	492.5	53.3
E	Python	Female	0.076	0.438	485.9	429.3	56.6
E	Python	Female	0.039	NA	522.5	429.3	93.2
M	Python	Male	0.091	0.387	565.7	418.7	147
M	Python	Male	0.103	0.751	556.8	427.6	129.2
M	Python	Male	0.089	0.315	547.9	414.3	133.6
M	Python	Male	0.116	0.451	592.4	436.5	155.9
M	Python	Male	0.089	0.401	565.7	441	124.7
M	Python	Female	0.037	0.394	457.8	332.5	125.3
M	Python	Female	0.057	0.345	448.2	356.6	91.6
M	Python	Female	0.047	0.365	501.2	371.1	130.1
M	Python	Female	0.052	0.727	453	351.8	101.2
R	Python	Female	0.074	0.362	384.9	334	50.9
R	Python	Female	0.101	0.286	410.4	331.1	79.3
R	Python	Female	0.121	0.369	407.5	328.3	79.2
R	Python	Female	0.067	0.355	376.4	325.5	50.9
R	Python	Female	0.111	0.278	390.6	331.1	59.5
R	Python	Male	0.089	0.663	647.2	468.3	178.9
R	Python	Male	0.091	0.426	662.4	472.1	190.3
R	Python	Male	0.089	0.291	654.8	464.5	190.3
R	Python	Male	0.131	0.36	662.4	498.7	163.7
R	Python	Male	0.103	0.305	632	464.5	167.5
S	Python	Male	0.062	0.436	518.5	366.3	152.2
S	Python	Male	0.069	0.532	493.8	349.8	144
S	Python	Male	0.064	0.485	461.2	352.9	108.3
S	Python	Male	0.062	0.335	470.6	362.4	108.2
S	Python	Male	0.071	0.495	508.2	390.6	117.6
S	Python	Female	0.069	0.264	438.4	387.5	50.9
S	Python	Female	0.099	0.323	407	328.8	78.2
T	Python	Female	0.099	0.433	497.7	341	156.7
T	Python	Female	0.084	0.337	506.9	368.7	138.2
T	Python	Female	0.057	0.414	497.7	350.2	147.5
T	Python	Female	0.076	0.365	456.2	331.8	124.4
T	Python	Female	0.089	0.323	471.7	364.1	107.6
